# Supplementary material for: Dominant Somatotype Development in Relation to Body Composition and Dietary Macronutrient Intake among High-Performance Athletes in Water, Cycling and Combat Sports
Source: MDPI journal article supplement (doi:10.3390/nu16101493), 2024-05-15
Supplement: s1 [file s1]

| Kodas | Sporto_sak | Sport_brar | Sakos | Lytis | Energ_san | amzius | Bendra_tr | ugis_cm | kuno_mas |
|-------|------------|------------|-------|-------|-----------|--------|-----------|---------|----------|
| 1     | 2.00       | 13         | 1.00  | 1     | 2724.34   | 28.00  | 120.00    | 163.30  | 66.50    |
| 5     | 3.00       | 6          | 2.00  | 1     | 4349.42   | 33.00  | 120.00    | 188.00  | 87.30    |
| 6     | 3.00       | 6          | 2.00  | 1     | 4473.48   | 25.00  | 120.00    | 181.00  | 90.00    |
| 7     | 3.00       | 5          | 2.00  | 1     | 4262.02   | 22.00  | 180.00    | 184.00  | 80.40    |
| 8     | 3.00       | 5          | 2.00  | 1     | 4286.61   | 23.00  | 180.00    | 186.50  | 80.80    |
| 9     | 3.00       | 5          | 2.00  | 1     | 4366.98   | 20.00  | 180.00    | 190.00  | 80.70    |
| 10    | 3.00       | 5          | 2.00  | 1     | 4034.27   | 23.00  | 180.00    | 180.00  | 74.80    |
| 11    | 3.00       | 5          | 2.00  | 1     | 4074.03   | 20.00  | 180.00    | 182.00  | 73.90    |
| 12    | 3.00       | 5          | 2.00  | 1     | 4240.39   | 20.00  | 180.00    | 190.00  | 76.50    |
| 13    | 3.00       | 5          | 2.00  | 1     | 4057.00   | 20.00  | 180.00    | 181.00  | 73.70    |
| 13    | 3.00       | 5          | 2.00  | 1     | 4002.75   | 20.00  | 300.00    | 181.00  | 71.90    |
| 14    | 2.00       | 11         | 1.00  | 1     | 4740.12   | 31.00  | 180.00    | 186.00  | 100.00   |
| 15    | 3.00       | 5          | 2.00  | 2     | 2419.13   | 17.00  | 150.00    | 166.00  | 57.20    |
| 16    | 3.00       | 5          | 2.00  | 2     | 2475.85   | 17.00  | 180.00    | 168.00  | 60.30    |
| 17    | 3.00       | 5          | 2.00  | 2     | 2505.43   | 17.00  | 120.00    | 175.00  | 60.80    |
| 18    | 3.00       | 5          | 2.00  | 2     | 2334.30   | 16.00  | 150.00    | 165.00  | 51.70    |
| 19    | 3.00       | 5          | 2.00  | 2     | 2459.46   | 16.00  | 150.00    | 167.50  | 58.90    |
| 20    | 3.00       | 5          | 2.00  | 1     | 3967.15   | 17.00  | 120.00    | 183.00  | 68.50    |
| 21    | 3.00       | 5          | 2.00  | 1     | 3685.20   | 17.00  | 90.00     | 176.00  | 61.70    |
| 22    | 3.00       | 5          | 2.00  | 1     | 3735.64   | 18.00  | 112.00    | 174.00  | 64.60    |
| 24    | 3.00       | 5          | 2.00  | 1     | 4110.19   | 18.00  | 120.00    | 187.50  | 72.10    |
| 25    | 3.00       | 5          | 2.00  | 1     | 4274.69   | 18.00  | 120.00    | 183.00  | 79.20    |
| 26    | 3.00       | 5          | 2.00  | 1     | 3818.98   | 18.00  | 120.00    | 175.00  | 67.00    |
| 28    | 3.00       | 5          | 2.00  | 1     | 4001.89   | 19.00  | 180.00    | 176.00  | 73.20    |
| 29    | 3.00       | 5          | 2.00  | 1     | 3819.62   | 17.00  | 180.00    | 180.00  | 64.70    |
| 30    | 3.00       | 5          | 2.00  | 1     | 2977.83   | 17.00  | 120.00    | 158.00  | 44.80    |
| 31    | 3.00       | 5          | 2.00  | 1     | 3778.68   | 16.00  | 120.00    | 173.00  | 65.40    |
| 32    | 3.00       | 5          | 2.00  | 1     | 3662.89   | 17.00  | 120.00    | 180.00  | 59.50    |
| 33    | 3.00       | 6          | 2.00  | 2     | 2529.09   | 17.00  | 90.00     | 171.00  | 63.00    |
| 33    | 3.00       | 6          | 2.00  | 2     | 2494.99   | 18.00  | 180.00    | 171.00  | 61.40    |
| 34    | 2.00       | 11         | 1.00  | 1     | 3662.08   | 15.00  | 120.00    | 172.00  | 61.40    |
| 37    | 2.00       | 11         | 1.00  | 1     | 3757.42   | 16.00  | 150.00    | 176.00  | 63.60    |
| 39    | 2.00       | 11         | 1.00  | 1     | 3154.23   | 15.00  | 90.00     | 162.00  | 48.20    |
| 39    | 2.00       | 11         | 1.00  | 1     | 3520.42   | 15.00  | 120.00    | 172.00  | 56.70    |
| 41    | 2.00       | 11         | 1.00  | 1     | 4513.37   | 15.00  | 120.00    | 185.00  | 84.90    |
| 42    | 3.00       | 5          | 2.00  | 1     | 4031.13   | 19.00  | 180.00    | 174.00  | 74.90    |
| 44    | 2.00       | 10         | 2.00  | 1     | 4393.42   | 22.00  | 240.00    | 188.00  | 83.30    |
| 47    | 3.00       | 4          | 2.00  | 1     | 4796.81   | 19.00  | 240.00    | 191.00  | 94.10    |
| 57    | 3.00       | 6          | 2.00  | 2     | 2540.96   | 16.00  | 180.00    | 168.00  | 63.80    |
| 62    | 3.00       | 6          | 2.00  | 2     | 2617.97   | 16.00  | 180.00    | 166.50  | 68.80    |
| 63    | 3.00       | 6          | 2.00  | 2     | 2620.55   | 15.00  | 180.00    | 169.00  | 68.00    |
| 64    | 2.00       | 10         | 2.00  | 2     | 2553.88   | 26.00  | 180.00    | 169.00  | 69.30    |
| 66    | 3.00       | 7          | 1.00  | 1     | 3541.82   | 15.00  | 240.00    | 166.00  | 59.60    |
| 67    | 3.00       | 7          | 1.00  | 1     | 3994.63   | 16.00  | 180.00    | 174.00  | 72.20    |
| 68    | 3.00       | 7          | 1.00  | 1     | 3708.30   | 16.00  | 240.00    | 174.00  | 62.70    |
| 70    | 3.00       | 7          | 1.00  | 1     | 3770.10   | 16.00  | 180.00    | 177.70  | 63.40    |

|     |      |    |      |   |         |       |        |        |        |
|-----|------|----|------|---|---------|-------|--------|--------|--------|
| 71  | 3.00 | 7  | 1.00 | 1 | 3570.75 | 15.00 | 120.00 | 170.00 | 59.10  |
| 72  | 3.00 | 7  | 1.00 | 1 | 2982.10 | 14.00 | 120.00 | 156.50 | 44.00  |
| 73  | 3.00 | 7  | 1.00 | 1 | 4335.74 | 14.00 | 90.00  | 179.00 | 80.70  |
| 74  | 3.00 | 5  | 2.00 | 2 | 2429.74 | 17.00 | 180.00 | 170.00 | 57.10  |
| 75  | 2.00 | 10 | 2.00 | 2 | 2337.36 | 16.00 | 180.00 | 166.00 | 51.70  |
| 76  | 2.00 | 10 | 2.00 | 2 | 2430.32 | 15.00 | 120.00 | 165.50 | 57.00  |
| 77  | 3.00 | 5  | 2.00 | 2 | 2486.22 | 18.00 | 120.00 | 174.00 | 60.30  |
| 81  | 2.00 | 11 | 1.00 | 1 | 4045.78 | 18.00 | 120.00 | 180.00 | 72.70  |
| 84  | 2.00 | 11 | 1.00 | 1 | 4044.77 | 17.00 | 120.00 | 178.00 | 72.90  |
| 89  | 3.00 | 5  | 2.00 | 1 | 4205.15 | 16.00 | 210.00 | 183.00 | 75.90  |
| 90  | 3.00 | 5  | 2.00 | 1 | 3657.06 | 18.00 | 90.00  | 168.50 | 64.00  |
| 91  | 3.00 | 4  | 2.00 | 1 | 4785.18 | 18.00 | 150.00 | 190.50 | 93.40  |
| 92  | 3.00 | 4  | 2.00 | 1 | 4693.39 | 17.00 | 180.00 | 193.40 | 88.80  |
| 93  | 3.00 | 4  | 2.00 | 1 | 4710.71 | 16.00 | 120.00 | 190.60 | 89.90  |
| 94  | 3.00 | 4  | 2.00 | 1 | 4443.85 | 16.00 | 150.00 | 191.00 | 80.90  |
| 95  | 3.00 | 4  | 2.00 | 1 | 5140.32 | 17.00 | 150.00 | 194.30 | 103.30 |
| 98  | 3.00 | 5  | 2.00 | 1 | 3981.36 | 16.00 | 120.00 | 178.00 | 70.30  |
| 99  | 3.00 | 5  | 2.00 | 1 | 3823.42 | 16.00 | 120.00 | 182.00 | 63.60  |
| 100 | 3.00 | 4  | 2.00 | 1 | 5264.64 | 21.00 | 180.00 | 202.00 | 106.60 |
| 101 | 2.00 | 11 | 1.00 | 1 | 5388.77 | 19.00 | 150.00 | 187.00 | 115.20 |
| 102 | 2.00 | 11 | 1.00 | 1 | 3436.71 | 17.00 | 180.00 | 163.00 | 58.20  |
| 103 | 2.00 | 11 | 1.00 | 1 | 3724.69 | 17.00 | 180.00 | 170.00 | 65.20  |
| 104 | 2.00 | 11 | 1.00 | 1 | 4335.01 | 17.00 | 180.00 | 180.00 | 81.80  |
| 105 | 2.00 | 11 | 1.00 | 1 | 4638.22 | 17.00 | 180.00 | 184.00 | 90.40  |
| 106 | 2.00 | 11 | 1.00 | 1 | 4041.03 | 18.00 | 180.00 | 184.50 | 70.90  |
| 107 | 2.00 | 11 | 1.00 | 1 | 4080.45 | 16.00 | 180.00 | 175.50 | 74.50  |
| 111 | 2.00 | 11 | 1.00 | 1 | 4029.65 | 18.00 | 180.00 | 181.00 | 71.80  |
| 112 | 2.00 | 11 | 1.00 | 1 | 3055.65 | 14.00 | 180.00 | 152.50 | 47.90  |
| 113 | 2.00 | 11 | 1.00 | 1 | 3719.61 | 16.00 | 180.00 | 169.00 | 64.90  |
| 114 | 2.00 | 11 | 1.00 | 1 | 4028.68 | 14.00 | 180.00 | 181.50 | 69.60  |
| 115 | 2.00 | 11 | 1.00 | 1 | 3677.10 | 16.00 | 180.00 | 175.00 | 61.30  |
| 123 | 3.00 | 6  | 2.00 | 1 | 4352.02 | 21.00 | 240.00 | 190.00 | 80.70  |
| 124 | 3.00 | 6  | 2.00 | 1 | 4401.87 | 22.00 | 240.00 | 180.00 | 86.50  |
| 125 | 3.00 | 5  | 2.00 | 1 | 4023.62 | 18.00 | 180.00 | 181.00 | 71.60  |
| 126 | 3.00 | 5  | 2.00 | 1 | 3782.39 | 19.00 | 180.00 | 175.50 | 66.10  |
| 129 | 3.00 | 4  | 2.00 | 1 | 4604.67 | 19.00 | 180.00 | 196.00 | 85.90  |
| 130 | 3.00 | 4  | 2.00 | 1 | 4758.38 | 19.00 | 180.00 | 196.00 | 91.00  |
| 131 | 3.00 | 8  | 1.00 | 2 | 2548.67 | 17.00 | 90.00  | 163.00 | 65.70  |
| 132 | 3.00 | 8  | 1.00 | 1 | 3167.49 | 15.00 | 90.00  | 158.00 | 50.10  |
| 133 | 3.00 | 8  | 1.00 | 1 | 4647.81 | 22.00 | 90.00  | 184.00 | 93.20  |
| 134 | 2.00 | 14 | 2.00 | 1 | 4632.06 | 20.00 | 210.00 | 193.00 | 88.40  |
| 135 | 2.00 | 14 | 2.00 | 1 | 4302.50 | 16.00 | 240.00 | 185.00 | 78.40  |
| 136 | 2.00 | 14 | 2.00 | 1 | 3939.39 | 18.00 | 300.00 | 178.00 | 69.90  |
| 137 | 2.00 | 14 | 2.00 | 1 | 4153.95 | 15.00 | 240.00 | 180.00 | 74.80  |
| 138 | 2.00 | 14 | 2.00 | 1 | 4703.58 | 16.00 | 135.00 | 190.50 | 89.70  |
| 139 | 2.00 | 14 | 2.00 | 1 | 4870.60 | 24.00 | 240.00 | 193.00 | 98.30  |
| 140 | 2.00 | 14 | 2.00 | 2 | 2738.70 | 14.00 | 180.00 | 173.00 | 74.00  |

|     |      |    |      |   |         |       |        |        |        |
|-----|------|----|------|---|---------|-------|--------|--------|--------|
| 141 | 3.00 | 8  | 1.00 | 1 | 4544.54 | 19.00 | 120.00 | 193.00 | 85.00  |
| 142 | 3.00 | 4  | 2.00 | 1 | 4830.61 | 18.00 | 180.00 | 196.00 | 92.90  |
| 143 | 3.00 | 4  | 2.00 | 1 | 4939.90 | 17.00 | 120.00 | 198.00 | 95.30  |
| 144 | 3.00 | 4  | 2.00 | 1 | 4459.66 | 20.00 | 120.00 | 185.00 | 85.60  |
| 145 | 2.00 | 14 | 2.00 | 1 | 4076.23 | 14.00 | 240.00 | 185.00 | 69.90  |
| 146 | 2.00 | 14 | 2.00 | 1 | 3666.74 | 15.00 | 120.00 | 179.00 | 59.00  |
| 147 | 2.00 | 14 | 2.00 | 1 | 3758.41 | 14.00 | 120.00 | 172.00 | 64.10  |
| 148 | 2.00 | 14 | 2.00 | 1 | 3749.06 | 14.00 | 180.00 | 178.00 | 61.60  |
| 149 | 2.00 | 14 | 2.00 | 1 | 3501.17 | 14.00 | 240.00 | 173.00 | 55.20  |
| 150 | 2.00 | 14 | 2.00 | 1 | 3924.62 | 14.00 | 180.00 | 183.00 | 65.60  |
| 151 | 2.00 | 14 | 2.00 | 2 | 2567.51 | 15.00 | 90.00  | 165.00 | 65.50  |
| 152 | 2.00 | 14 | 2.00 | 2 | 2096.68 | 15.00 | 90.00  | 153.00 | 38.90  |
| 153 | 2.00 | 14 | 2.00 | 1 | 4323.18 | 15.00 | 135.00 | 191.00 | 76.40  |
| 154 | 2.00 | 14 | 2.00 | 2 | 2528.34 | 15.00 | 135.00 | 165.00 | 63.10  |
| 155 | 2.00 | 14 | 2.00 | 2 | 2358.41 | 15.00 | 120.00 | 166.00 | 52.50  |
| 156 | 2.00 | 14 | 2.00 | 2 | 2271.10 | 15.00 | 120.00 | 162.00 | 47.90  |
| 159 | 3.00 | 6  | 2.00 | 1 | 5099.40 | 23.00 | 240.00 | 196.00 | 104.30 |
| 160 | 2.00 | 14 | 2.00 | 2 | 2233.97 | 15.00 | 120.00 | 160.00 | 46.00  |
| 184 | 3.00 | 5  | 2.00 | 2 | 2443.92 | 20.00 | 120.00 | 167.00 | 60.00  |
| 190 | 3.00 | 5  | 2.00 | 1 | 4102.30 | 27.00 | 240.00 | 184.50 | 77.40  |
| 192 | 3.00 | 6  | 2.00 | 1 | 4513.56 | 25.00 | 240.00 | 183.00 | 90.60  |
| 211 | 3.00 | 7  | 1.00 | 1 | 4974.62 | 16.00 | 120.00 | 185.00 | 100.70 |
| 212 | 3.00 | 7  | 1.00 | 1 | 3451.05 | 16.00 | 90.00  | 175.00 | 53.80  |
| 213 | 3.00 | 7  | 1.00 | 1 | 3438.14 | 15.00 | 120.00 | 170.00 | 54.70  |
| 214 | 3.00 | 7  | 1.00 | 1 | 3371.08 | 15.00 | 90.00  | 165.00 | 54.30  |
| 217 | 2.00 | 14 | 2.00 | 1 | 4768.21 | 18.00 | 240.00 | 198.00 | 90.10  |
| 218 | 2.00 | 14 | 2.00 | 1 | 3993.48 | 18.00 | 240.00 | 181.00 | 70.60  |
| 219 | 3.00 | 5  | 2.00 | 1 | 4007.50 | 18.00 | 150.00 | 182.00 | 70.70  |
| 220 | 3.00 | 5  | 2.00 | 2 | 2331.45 | 16.00 | 150.00 | 163.00 | 51.90  |
| 224 | 2.00 | 14 | 2.00 | 2 | 2468.03 | 19.00 | 240.00 | 168.00 | 60.80  |
| 225 | 2.00 | 14 | 2.00 | 2 | 2359.19 | 16.00 | 240.00 | 163.00 | 53.60  |
| 226 | 2.00 | 14 | 2.00 | 1 | 3859.90 | 16.00 | 240.00 | 176.00 | 67.00  |
| 227 | 2.00 | 14 | 2.00 | 1 | 4059.79 | 18.00 | 240.00 | 181.00 | 72.80  |
| 228 | 2.00 | 14 | 2.00 | 1 | 4580.55 | 19.00 | 240.00 | 196.00 | 85.10  |
| 229 | 2.00 | 14 | 2.00 | 1 | 4454.05 | 17.00 | 240.00 | 190.00 | 82.10  |
| 230 | 2.00 | 14 | 2.00 | 1 | 4656.39 | 22.00 | 240.00 | 193.00 | 90.20  |
| 231 | 2.00 | 10 | 2.00 | 2 | 2568.53 | 21.00 | 270.00 | 173.00 | 67.00  |
| 232 | 2.00 | 10 | 2.00 | 2 | 2403.09 | 21.00 | 200.00 | 168.00 | 57.80  |
| 233 | 2.00 | 10 | 2.00 | 2 | 2506.65 | 17.00 | 180.00 | 169.00 | 62.00  |
| 234 | 2.00 | 10 | 2.00 | 2 | 2730.03 | 17.00 | 120.00 | 178.00 | 74.00  |
| 235 | 2.00 | 10 | 2.00 | 2 | 2703.88 | 24.00 | 270.00 | 176.00 | 76.20  |
| 236 | 2.00 | 10 | 2.00 | 2 | 2472.28 | 23.00 | 270.00 | 174.50 | 61.80  |
| 237 | 2.00 | 11 | 1.00 | 1 | 4666.24 | 17.00 | 120.00 | 186.00 | 90.60  |
| 238 | 3.00 | 7  | 1.00 | 1 | 3549.77 | 16.00 | 90.00  | 170.00 | 58.90  |
| 240 | 2.00 | 11 | 1.00 | 1 | 4378.84 | 14.00 | 180.00 | 181.00 | 81.40  |
| 241 | 3.00 | 7  | 1.00 | 1 | 3559.56 | 16.00 | 210.00 | 175.00 | 57.40  |
| 242 | 3.00 | 7  | 1.00 | 1 | 3123.30 | 16.00 | 120.00 | 160.00 | 48.40  |

|     |      |    |      |   |         |       |        |        |        |
|-----|------|----|------|---|---------|-------|--------|--------|--------|
| 243 | 3.00 | 5  | 2.00 | 1 | 4170.03 | 16.00 | 120.00 | 182.00 | 75.10  |
| 244 | 2.00 | 13 | 1.00 | 2 | 2338.15 | 17.00 | 120.00 | 155.00 | 54.30  |
| 245 | 2.00 | 13 | 1.00 | 1 | 2648.69 | 14.00 | 90.00  | 144.00 | 37.50  |
| 246 | 2.00 | 13 | 1.00 | 2 | 2390.06 | 14.00 | 130.00 | 162.00 | 54.70  |
| 247 | 2.00 | 13 | 1.00 | 2 | 2445.45 | 17.00 | 90.00  | 173.00 | 57.50  |
| 248 | 2.00 | 13 | 1.00 | 1 | 3307.74 | 16.00 | 120.00 | 168.00 | 51.60  |
| 249 | 2.00 | 13 | 1.00 | 2 | 2494.27 | 15.00 | 90.00  | 172.00 | 59.70  |
| 251 | 2.00 | 11 | 1.00 | 1 | 4018.15 | 27.00 | 180.00 | 170.00 | 79.90  |
| 254 | 2.00 | 11 | 1.00 | 1 | 4141.08 | 24.00 | 180.00 | 176.00 | 80.30  |
| 255 | 2.00 | 11 | 1.00 | 1 | 4536.09 | 23.00 | 180.00 | 190.00 | 87.80  |
| 256 | 2.00 | 11 | 1.00 | 1 | 4333.87 | 23.00 | 180.00 | 176.00 | 86.20  |
| 257 | 2.00 | 11 | 1.00 | 1 | 4136.79 | 22.00 | 180.00 | 177.00 | 78.80  |
| 258 | 2.00 | 11 | 1.00 | 1 | 3792.67 | 24.00 | 180.00 | 172.00 | 70.20  |
| 259 | 2.00 | 11 | 1.00 | 1 | 4415.84 | 23.00 | 120.00 | 184.00 | 86.00  |
| 263 | 2.00 | 13 | 1.00 | 1 | 3724.53 | 17.00 | 120.00 | 173.00 | 64.10  |
| 264 | 2.00 | 13 | 1.00 | 2 | 2344.33 | 21.00 | 180.00 | 168.00 | 54.20  |
| 265 | 2.00 | 13 | 1.00 | 1 | 2822.40 | 15.00 | 180.00 | 148.00 | 42.30  |
| 266 | 2.00 | 13 | 1.00 | 1 | 4979.74 | 16.00 | 120.00 | 183.00 | 101.60 |
| 270 | 2.00 | 13 | 1.00 | 2 | 2259.40 | 29.00 | 90.00  | 159.00 | 54.60  |
| 271 | 3.00 | 5  | 2.00 | 1 | 4268.33 | 15.00 | 120.00 | 183.00 | 77.50  |
| 273 | 3.00 | 4  | 2.00 | 1 | 4401.21 | 16.00 | 150.00 | 180.00 | 83.50  |
| 274 | 3.00 | 4  | 2.00 | 1 | 4397.05 | 18.00 | 150.00 | 187.00 | 81.80  |
| 290 | 2.00 | 14 | 2.00 | 1 | 4074.55 | 18.00 | 300.00 | 187.00 | 71.10  |
| 291 | 2.00 | 14 | 2.00 | 1 | 3949.26 | 16.00 | 240.00 | 177.00 | 69.60  |
| 292 | 2.00 | 14 | 2.00 | 1 | 4486.79 | 16.00 | 240.00 | 196.00 | 80.50  |
| 293 | 2.00 | 14 | 2.00 | 2 | 2534.67 | 15.00 | 180.00 | 174.00 | 61.80  |
| 295 | 3.00 | 5  | 2.00 | 2 | 2388.36 | 16.00 | 120.00 | 164.00 | 55.20  |
| 297 | 3.00 | 6  | 2.00 | 1 | 4292.20 | 21.00 | 130.00 | 181.00 | 82.00  |
| 299 | 2.00 | 14 | 2.00 | 2 | 2182.15 | 27.00 | 240.00 | 160.00 | 48.70  |
| 300 | 2.00 | 14 | 2.00 | 1 | 3808.46 | 17.00 | 150.00 | 182.00 | 63.60  |
| 301 | 2.00 | 10 | 2.00 | 2 | 2386.29 | 23.00 | 180.00 | 172.00 | 57.00  |
| 306 | 2.00 | 14 | 2.00 | 1 | 4223.49 | 17.00 | 90.00  | 180.00 | 78.10  |
| 307 | 2.00 | 14 | 2.00 | 1 | 4310.55 | 18.00 | 120.00 | 189.00 | 78.20  |
| 308 | 3.00 | 4  | 2.00 | 1 | 4735.70 | 17.00 | 120.00 | 203.00 | 86.70  |
| 309 | 3.00 | 4  | 2.00 | 1 | 4895.59 | 17.00 | 120.00 | 200.00 | 93.10  |
| 313 | 3.00 | 4  | 2.00 | 1 | 4423.01 | 17.00 | 240.00 | 188.00 | 81.80  |
| 314 | 3.00 | 4  | 2.00 | 1 | 4428.14 | 17.00 | 240.00 | 186.00 | 82.70  |
| 315 | 3.00 | 4  | 2.00 | 1 | 3899.57 | 15.00 | 150.00 | 184.00 | 64.90  |
| 316 | 3.00 | 4  | 2.00 | 1 | 4568.63 | 16.00 | 240.00 | 187.00 | 86.50  |
| 317 | 3.00 | 4  | 2.00 | 1 | 4415.82 | 16.00 | 240.00 | 189.00 | 80.70  |
| 322 | 3.00 | 4  | 2.00 | 2 | 2736.69 | 25.00 | 180.00 | 176.00 | 78.70  |
| 323 | 3.00 | 4  | 2.00 | 2 | 2507.30 | 22.00 | 180.00 | 170.00 | 64.30  |
| 324 | 3.00 | 4  | 2.00 | 2 | 2648.29 | 24.00 | 210.00 | 184.50 | 71.20  |
| 325 | 2.00 | 14 | 2.00 | 1 | 4142.95 | 15.00 | 300.00 | 179.00 | 74.80  |
| 326 | 2.00 | 14 | 2.00 | 1 | 4531.54 | 20.00 | 240.00 | 194.00 | 84.70  |
| 327 | 2.00 | 14 | 2.00 | 2 | 2455.68 | 16.00 | 180.00 | 170.00 | 58.20  |
| 328 | 2.00 | 14 | 2.00 | 2 | 2408.19 | 21.00 | 210.00 | 167.00 | 58.30  |

|     |      |    |      |   |         |       |        |        |       |
|-----|------|----|------|---|---------|-------|--------|--------|-------|
| 329 | 2.00 | 14 | 2.00 | 2 | 2454.12 | 14.00 | 300.00 | 176.00 | 56.00 |
| 330 | 2.00 | 14 | 2.00 | 1 | 4150.63 | 15.00 | 180.00 | 186.00 | 72.50 |

| total_body | total_body | intralasteli | ekstralaste | edemos_in | Lieknoji_ki | Lieknoji_ki | Raumenu_ | Raumenu_ | Kaires_ran |
|------------|------------|--------------|-------------|-----------|-------------|-------------|----------|----------|------------|
| 39.20      | 59.00      | 25.60        | 13.60       | 0.35      | 54.40       | 81.80       | 50.60    | 76.10    | 3.54       |
| 53.90      | 61.80      | 35.10        | 18.80       | 0.35      | 74.90       | 85.80       | 69.80    | 80.00    | 4.82       |
| 47.60      | 52.80      | 31.40        | 16.20       | 0.34      | 66.10       | 73.40       | 60.90    | 67.50    | 4.12       |
| 48.00      | 59.80      | 31.40        | 16.60       | 0.35      | 66.70       | 83.00       | 62.00    | 77.20    | 4.22       |
| 47.40      | 58.70      | 31.00        | 16.40       | 0.35      | 65.90       | 81.60       | 61.20    | 75.80    | 4.06       |
| 49.80      | 61.70      | 32.40        | 17.40       | 0.35      | 69.10       | 85.60       | 64.40    | 79.80    | 4.35       |
| 44.00      | 58.90      | 28.90        | 15.10       | 0.34      | 61.10       | 81.70       | 56.80    | 76.00    | 3.85       |
| 45.40      | 61.40      | 29.60        | 15.80       | 0.35      | 63.10       | 85.40       | 58.70    | 79.40    | 3.97       |
| 46.90      | 61.30      | 30.70        | 16.20       | 0.35      | 65.10       | 85.10       | 60.70    | 79.30    | 4.05       |
| 43.50      | 59.10      | 28.40        | 15.10       | 0.35      | 60.40       | 82.00       | 56.10    | 76.20    | 3.84       |
| 42.60      | 59.30      | 27.90        | 14.70       | 0.35      | 59.20       | 82.30       | 55.00    | 76.50    | 3.66       |
| 65.40      | 65.40      | 42.20        | 23.20       | 0.35      | 90.90       | 90.90       | 84.90    | 84.90    | 6.01       |
| 31.30      | 54.60      | 20.30        | 11.00       | 0.35      | 43.50       | 76.00       | 40.20    | 70.20    | 2.60       |
| 31.50      | 52.20      | 20.70        | 10.80       | 0.34      | 43.80       | 72.60       | 40.30    | 66.80    | 2.59       |
| 34.50      | 56.70      | 22.40        | 12.10       | 0.35      | 47.90       | 78.80       | 44.40    | 73.00    | 2.93       |
| 28.70      | 55.50      | 18.60        | 10.10       | 0.35      | 39.90       | 77.20       | 36.90    | 71.40    | 2.32       |
| 32.20      | 54.70      | 21.00        | 11.20       | 0.35      | 44.70       | 75.90       | 41.30    | 70.10    | 2.73       |
| 42.10      | 61.50      | 27.60        | 14.50       | 0.34      | 58.50       | 85.40       | 54.50    | 79.60    | 3.75       |
| 39.00      | 63.20      | 25.60        | 13.40       | 0.34      | 54.20       | 87.80       | 50.50    | 81.80    | 3.41       |
| 39.20      | 60.70      | 25.70        | 13.50       | 0.34      | 54.50       | 84.40       | 50.70    | 78.50    | 3.37       |
| 43.30      | 60.10      | 28.50        | 14.80       | 0.34      | 60.10       | 83.40       | 55.90    | 77.60    | 3.70       |
| 46.20      | 58.40      | 30.30        | 15.90       | 0.34      | 64.20       | 81.10       | 59.60    | 75.30    | 3.96       |
| 41.20      | 61.50      | 26.90        | 14.30       | 0.35      | 57.20       | 85.40       | 53.30    | 79.60    | 3.57       |
| 40.40      | 55.20      | 26.50        | 13.90       | 0.34      | 56.10       | 76.60       | 51.90    | 70.90    | 3.42       |
| 41.40      | 64.00      | 26.70        | 14.70       | 0.36      | 57.50       | 88.90       | 53.70    | 83.00    | 3.54       |
| 30.00      | 67.00      | 19.30        | 10.70       | 0.36      | 41.70       | 93.10       | 39.00    | 87.10    | 2.58       |
| 40.70      | 62.30      | 26.30        | 14.40       | 0.35      | 56.50       | 86.40       | 52.70    | 80.60    | 3.53       |
| 39.20      | 65.80      | 25.50        | 13.70       | 0.35      | 54.50       | 91.60       | 50.90    | 85.50    | 3.40       |
| 35.60      | 56.50      | 23.20        | 12.40       | 0.35      | 49.40       | 78.40       | 45.80    | 72.70    | 3.03       |
| 34.80      | 56.68      | 22.60        | 12.20       | 0.35      | 48.40       | 78.83       | 44.80    | 72.96    | 2.97       |
| 38.50      | 62.60      | 24.90        | 13.60       | 0.35      | 53.50       | 87.10       | 49.90    | 81.20    | 3.32       |
| 40.20      | 63.20      | 26.00        | 14.20       | 0.35      | 55.80       | 87.70       | 52.10    | 81.90    | 3.52       |
| 32.00      | 66.40      | 20.60        | 11.40       | 0.36      | 44.50       | 92.30       | 41.60    | 86.30    | 2.76       |
| 36.30      | 64.02      | 23.40        | 12.90       | 0.36      | 50.40       | 88.89       | 47.10    | 83.07    | 3.15       |
| 48.20      | 56.70      | 31.20        | 17.00       | 0.35      | 67.00       | 78.90       | 62.00    | 73.00    | 4.19       |
| 41.50      | 55.30      | 27.30        | 14.20       | 0.34      | 57.70       | 77.00       | 53.30    | 71.10    | 3.60       |
| 47.70      | 57.30      | 31.80        | 15.90       | 0.33      | 66.20       | 79.50       | 61.40    | 73.70    | 4.14       |
| 51.90      | 55.20      | 34.00        | 17.90       | 0.34      | 72.10       | 76.60       | 66.70    | 70.90    | 4.41       |
| 34.80      | 54.60      | 22.60        | 12.20       | 0.35      | 48.40       | 75.90       | 44.70    | 70.10    | 2.99       |
| 35.90      | 52.20      | 23.30        | 12.60       | 0.35      | 49.90       | 72.50       | 45.90    | 66.70    | 3.01       |
| 35.20      | 51.80      | 23.20        | 12.00       | 0.34      | 48.90       | 71.90       | 45.00    | 66.20    | 3.00       |
| 35.40      | 51.10      | 23.10        | 12.30       | 0.35      | 49.20       | 71.00       | 45.20    | 65.20    | 2.90       |
| 34.80      | 58.40      | 22.80        | 12.00       | 0.35      | 48.40       | 81.20       | 44.90    | 75.30    | 2.95       |
| 42.20      | 58.50      | 27.90        | 14.30       | 0.34      | 58.60       | 81.20       | 54.40    | 75.40    | 3.65       |
| 39.00      | 62.30      | 25.70        | 13.30       | 0.34      | 54.10       | 86.30       | 50.50    | 80.60    | 3.44       |
| 40.30      | 63.60      | 26.40        | 13.90       | 0.35      | 56.00       | 88.30       | 52.30    | 82.50    | 3.64       |

|       |       |       |       |      |       |       |       |       |      |
|-------|-------|-------|-------|------|-------|-------|-------|-------|------|
| 39.10 | 66.20 | 25.10 | 14.00 | 0.36 | 54.30 | 91.90 | 50.80 | 86.00 | 3.37 |
| 29.30 | 66.60 | 19.00 | 10.30 | 0.35 | 40.70 | 92.50 | 38.10 | 86.60 | 2.52 |
| 47.40 | 57.90 | 30.70 | 16.70 | 0.35 | 63.70 | 78.90 | 59.10 | 73.20 | 4.06 |
| 34.90 | 61.00 | 23.30 | 11.60 | 0.33 | 48.50 | 84.90 | 45.10 | 78.90 | 2.99 |
| 30.70 | 59.40 | 20.00 | 10.70 | 0.35 | 42.70 | 82.60 | 39.60 | 76.60 | 2.57 |
| 31.00 | 55.10 | 20.40 | 10.60 | 0.34 | 43.00 | 76.40 | 39.80 | 70.70 | 2.67 |
| 34.80 | 57.70 | 22.30 | 12.50 | 0.36 | 48.30 | 80.10 | 44.80 | 74.30 | 2.91 |
| 43.10 | 59.30 | 28.10 | 15.00 | 0.35 | 59.80 | 82.30 | 55.60 | 76.50 | 3.82 |
| 43.60 | 59.80 | 28.50 | 15.10 | 0.35 | 60.50 | 83.00 | 56.30 | 77.20 | 3.94 |
| 45.60 | 60.10 | 29.70 | 15.90 | 0.35 | 63.40 | 83.50 | 58.90 | 77.60 | 3.95 |
| 37.90 | 59.20 | 24.40 | 13.50 | 0.36 | 52.60 | 82.20 | 48.90 | 76.40 | 3.24 |
| 53.70 | 57.50 | 35.10 | 18.60 | 0.35 | 74.60 | 79.90 | 69.20 | 74.10 | 4.81 |
| 50.60 | 57.00 | 33.10 | 17.50 | 0.35 | 70.30 | 79.20 | 65.10 | 73.30 | 4.43 |
| 50.00 | 55.60 | 32.80 | 17.20 | 0.34 | 69.40 | 77.20 | 64.20 | 71.40 | 4.36 |
| 48.60 | 60.00 | 31.80 | 16.80 | 0.35 | 67.50 | 83.40 | 62.80 | 77.60 | 4.33 |
| 55.00 | 53.00 | 36.30 | 18.70 | 0.34 | 76.40 | 73.70 | 70.40 | 67.90 | 4.82 |
| 41.50 | 59.10 | 27.10 | 14.40 | 0.35 | 57.70 | 82.10 | 53.60 | 76.30 | 3.65 |
| 41.30 | 65.00 | 26.90 | 14.40 | 0.35 | 57.30 | 90.10 | 53.60 | 84.30 | 3.49 |
| 56.30 | 52.90 | 37.20 | 19.10 | 0.34 | 78.20 | 73.40 | 72.10 | 67.70 | 4.91 |
| 65.20 | 56.60 | 42.40 | 22.80 | 0.35 | 90.50 | 78.56 | 83.90 | 72.83 | 5.83 |
| 36.60 | 62.90 | 23.60 | 13.00 | 0.36 | 50.80 | 87.30 | 47.40 | 81.50 | 3.26 |
| 39.60 | 60.80 | 25.70 | 13.90 | 0.35 | 55.00 | 84.40 | 51.20 | 78.60 | 3.53 |
| 47.20 | 57.80 | 30.60 | 16.60 | 0.35 | 65.50 | 80.10 | 60.80 | 74.40 | 4.15 |
| 49.50 | 54.70 | 32.20 | 17.30 | 0.35 | 68.80 | 76.10 | 63.60 | 70.30 | 4.29 |
| 43.60 | 61.50 | 28.40 | 15.20 | 0.35 | 60.60 | 85.50 | 56.40 | 79.60 | 3.79 |
| 43.40 | 58.20 | 28.30 | 15.10 | 0.35 | 60.30 | 80.90 | 56.00 | 75.10 | 3.78 |
| 44.10 | 61.40 | 28.60 | 15.50 | 0.35 | 61.20 | 85.20 | 57.00 | 79.40 | 3.90 |
| 30.70 | 64.00 | 19.90 | 10.80 | 0.35 | 42.70 | 89.10 | 39.80 | 83.00 | 2.75 |
| 40.10 | 61.70 | 25.90 | 14.20 | 0.36 | 55.70 | 85.80 | 51.90 | 79.90 | 3.61 |
| 43.20 | 62.10 | 28.00 | 15.20 | 0.35 | 60.00 | 86.20 | 55.90 | 80.30 | 3.81 |
| 39.80 | 64.90 | 25.50 | 14.30 | 0.36 | 55.30 | 90.20 | 51.70 | 84.30 | 3.50 |
| 46.80 | 58.00 | 30.90 | 15.90 | 0.34 | 65.00 | 80.50 | 60.30 | 74.70 | 4.22 |
| 50.30 | 58.10 | 33.30 | 17.00 | 0.34 | 69.80 | 80.70 | 64.80 | 74.90 | 4.51 |
| 43.20 | 60.30 | 28.30 | 14.90 | 0.35 | 60.00 | 83.80 | 55.80 | 77.90 | 3.76 |
| 39.40 | 59.70 | 25.60 | 13.80 | 0.35 | 54.70 | 82.80 | 50.90 | 77.10 | 3.28 |
| 50.40 | 58.70 | 32.80 | 17.60 | 0.35 | 70.00 | 81.50 | 65.00 | 75.70 | 4.48 |
| 56.30 | 61.90 | 36.50 | 19.80 | 0.35 | 78.20 | 80.10 | 72.90 | 80.10 | 5.07 |
| 33.30 | 50.70 | 21.70 | 11.60 | 0.35 | 46.30 | 70.50 | 42.50 | 64.70 | 2.77 |
| 32.40 | 64.60 | 20.80 | 11.60 | 0.36 | 45.00 | 89.80 | 42.00 | 83.80 | 2.75 |
| 51.00 | 54.70 | 33.30 | 17.70 | 0.35 | 70.90 | 76.10 | 65.50 | 70.30 | 4.45 |
| 49.60 | 56.00 | 32.70 | 16.90 | 0.34 | 68.90 | 77.90 | 63.80 | 72.10 | 4.26 |
| 45.10 | 57.50 | 29.90 | 15.20 | 0.34 | 62.70 | 80.00 | 58.10 | 74.10 | 3.84 |
| 39.40 | 56.40 | 26.40 | 13.00 | 0.33 | 54.70 | 78.30 | 50.70 | 72.60 | 3.29 |
| 44.90 | 60.10 | 29.20 | 15.70 | 0.35 | 62.30 | 83.30 | 58.00 | 77.60 | 4.00 |
| 50.30 | 56.00 | 33.00 | 17.30 | 0.34 | 69.90 | 77.90 | 64.70 | 72.10 | 4.36 |
| 56.40 | 57.40 | 37.20 | 19.20 | 0.34 | 78.40 | 79.80 | 72.70 | 74.00 | 4.99 |
| 39.30 | 53.10 | 25.70 | 13.60 | 0.35 | 54.60 | 73.80 | 50.30 | 68.00 | 3.25 |

|       |       |       |       |      |       |       |       |       |      |
|-------|-------|-------|-------|------|-------|-------|-------|-------|------|
| 49.80 | 58.60 | 32.30 | 17.50 | 0.35 | 69.10 | 81.30 | 64.20 | 75.50 | 4.28 |
| 51.40 | 55.40 | 33.70 | 17.70 | 0.35 | 71.40 | 76.90 | 66.00 | 71.10 | 4.39 |
| 54.40 | 57.00 | 35.90 | 18.50 | 0.34 | 75.60 | 79.30 | 70.00 | 73.40 | 4.74 |
| 52.10 | 60.90 | 34.10 | 18.00 | 0.35 | 72.30 | 84.50 | 67.30 | 78.70 | 4.54 |
| 43.10 | 61.80 | 28.10 | 15.00 | 0.35 | 59.90 | 85.70 | 55.80 | 79.80 | 3.72 |
| 38.20 | 64.80 | 25.00 | 13.20 | 0.35 | 53.10 | 90.00 | 49.60 | 84.10 | 3.25 |
| 38.70 | 60.40 | 25.20 | 13.50 | 0.35 | 53.70 | 83.80 | 50.00 | 78.00 | 3.37 |
| 39.10 | 63.50 | 25.10 | 14.00 | 0.36 | 54.30 | 88.10 | 50.70 | 82.30 | 3.39 |
| 36.40 | 66.00 | 23.30 | 13.10 | 0.36 | 50.50 | 91.50 | 47.30 | 85.70 | 3.12 |
| 42.60 | 64.90 | 27.60 | 15.00 | 0.35 | 59.10 | 90.10 | 55.30 | 84.30 | 3.76 |
| 34.60 | 52.90 | 22.40 | 12.20 | 0.35 | 48.00 | 73.30 | 44.30 | 67.70 | 2.95 |
| 23.90 | 61.40 | 15.30 | 8.60  | 0.36 | 33.20 | 85.30 | 30.90 | 79.40 | 2.02 |
| 46.30 | 60.60 | 29.80 | 16.50 | 0.36 | 64.30 | 84.20 | 59.80 | 78.30 | 4.02 |
| 34.10 | 54.10 | 21.80 | 12.30 | 0.36 | 47.30 | 69.30 | 43.70 | 69.30 | 2.80 |
| 30.80 | 58.60 | 19.70 | 11.10 | 0.36 | 42.80 | 81.50 | 39.70 | 75.60 | 2.52 |
| 29.30 | 61.20 | 18.80 | 10.50 | 0.36 | 40.70 | 85.00 | 37.90 | 79.20 | 2.45 |
| 58.20 | 55.60 | 38.20 | 20.00 | 0.34 | 80.80 | 77.50 | 74.80 | 71.70 | 5.10 |
| 28.20 | 60.30 | 18.20 | 10.00 | 0.35 | 39.20 | 83.90 | 36.40 | 77.90 | 2.33 |
| 34.30 | 57.20 | 21.70 | 12.60 | 0.37 | 47.70 | 79.50 | 44.20 | 73.70 | 2.88 |
| 45.20 | 58.40 | 29.40 | 15.80 | 0.35 | 62.80 | 81.10 | 58.30 | 75.30 | 3.87 |
| 55.20 | 60.90 | 35.80 | 19.40 | 0.35 | 76.60 | 84.50 | 71.40 | 78.80 | 4.89 |
| 51.70 | 51.30 | 34.00 | 17.70 | 0.34 | 71.80 | 71.30 | 66.10 | 65.60 | 4.41 |
| 36.60 | 68.10 | 23.50 | 13.10 | 0.36 | 50.90 | 94.60 | 47.70 | 88.70 | 3.17 |
| 34.60 | 63.30 | 22.70 | 11.90 | 0.34 | 48.00 | 87.80 | 44.80 | 81.90 | 2.91 |
| 34.80 | 64.00 | 22.60 | 12.20 | 0.35 | 48.40 | 89.10 | 45.20 | 83.20 | 2.96 |
| 53.70 | 59.60 | 35.00 | 18.70 | 0.35 | 74.60 | 82.80 | 69.30 | 76.90 | 4.77 |
| 42.80 | 60.60 | 28.00 | 14.80 | 0.35 | 59.40 | 84.10 | 55.30 | 78.30 | 3.69 |
| 42.00 | 59.40 | 27.50 | 14.50 | 0.35 | 58.40 | 82.60 | 54.20 | 76.70 | 3.59 |
| 28.70 | 55.30 | 18.90 | 9.80  | 0.34 | 39.80 | 76.70 | 36.90 | 71.10 | 2.38 |
| 33.20 | 54.60 | 21.50 | 11.70 | 0.35 | 46.10 | 75.80 | 42.60 | 70.10 | 2.76 |
| 30.30 | 56.50 | 19.70 | 10.60 | 0.35 | 42.10 | 78.50 | 39.00 | 72.80 | 2.51 |
| 41.20 | 61.50 | 26.90 | 14.30 | 0.35 | 57.20 | 85.40 | 53.30 | 79.60 | 3.61 |
| 43.90 | 60.30 | 28.60 | 15.30 | 0.35 | 61.00 | 83.80 | 56.70 | 77.90 | 3.81 |
| 52.20 | 61.30 | 33.80 | 18.40 | 0.35 | 72.50 | 85.20 | 67.50 | 79.30 | 4.65 |
| 48.60 | 59.20 | 32.00 | 16.60 | 0.34 | 67.50 | 82.20 | 62.70 | 76.40 | 4.29 |
| 53.50 | 59.30 | 34.70 | 18.80 | 0.35 | 74.30 | 82.40 | 69.10 | 76.60 | 4.73 |
| 36.20 | 54.00 | 23.50 | 12.70 | 0.35 | 50.30 | 75.10 | 46.40 | 69.30 | 2.97 |
| 32.40 | 56.10 | 21.20 | 11.20 | 0.35 | 45.00 | 77.90 | 41.71 | 72.20 | 2.67 |
| 33.00 | 53.20 | 21.50 | 11.50 | 0.35 | 45.80 | 73.90 | 42.30 | 68.20 | 2.70 |
| 38.80 | 52.40 | 25.30 | 13.50 | 0.35 | 53.90 | 72.80 | 49.60 | 67.00 | 3.18 |
| 40.10 | 52.60 | 25.60 | 14.50 | 0.36 | 55.70 | 73.10 | 51.30 | 67.30 | 3.27 |
| 36.90 | 59.70 | 23.50 | 13.40 | 0.36 | 51.20 | 82.80 | 47.60 | 77.00 | 3.09 |
| 51.80 | 57.20 | 33.60 | 18.20 | 0.35 | 72.00 | 79.50 | 66.70 | 73.60 | 4.59 |
| 37.00 | 62.80 | 24.10 | 12.90 | 0.35 | 51.40 | 87.30 | 47.90 | 81.30 | 3.27 |
| 46.60 | 57.20 | 30.50 | 16.10 | 0.35 | 64.70 | 79.50 | 60.00 | 73.70 | 4.12 |
| 36.90 | 64.30 | 24.10 | 12.80 | 0.35 | 51.20 | 89.20 | 47.90 | 83.40 | 3.12 |
| 32.20 | 66.50 | 20.70 | 11.50 | 0.36 | 44.70 | 92.40 | 41.80 | 86.40 | 2.77 |



|       |       |       |       |      |       |       |       |       |      |
|-------|-------|-------|-------|------|-------|-------|-------|-------|------|
| 43.20 | 57.50 | 28.60 | 14.60 | 0.34 | 60.00 | 79.90 | 55.60 | 74.00 | 3.70 |
| 28.90 | 53.20 | 18.60 | 10.30 | 0.36 | 40.20 | 74.00 | 37.00 | 68.10 | 2.47 |
| 25.00 | 66.60 | 15.90 | 9.10  | 0.36 | 34.70 | 92.50 | 32.50 | 86.60 | 2.13 |
| 30.40 | 55.50 | 19.40 | 11.00 | 0.36 | 42.20 | 77.10 | 39.10 | 71.40 | 2.60 |
| 33.90 | 59.00 | 21.60 | 12.30 | 0.36 | 47.10 | 81.90 | 43.70 | 76.00 | 2.82 |
| 33.30 | 64.50 | 21.30 | 12.00 | 0.36 | 46.20 | 89.50 | 43.20 | 83.70 | 2.85 |
| 33.70 | 56.50 | 21.70 | 12.00 | 0.36 | 46.80 | 78.40 | 43.40 | 72.70 | 2.90 |
| 45.90 | 57.40 | 29.90 | 16.00 | 0.35 | 63.70 | 79.70 | 59.10 | 73.90 | 4.08 |
| 45.40 | 56.60 | 29.70 | 15.70 | 0.35 | 63.00 | 78.50 | 58.40 | 72.80 | 4.05 |
| 53.60 | 61.10 | 34.70 | 18.90 | 0.35 | 74.50 | 84.90 | 69.30 | 79.00 | 4.70 |
| 52.20 | 60.60 | 33.90 | 18.30 | 0.35 | 72.50 | 84.10 | 67.50 | 78.30 | 4.65 |
| 47.40 | 60.20 | 30.90 | 16.50 | 0.35 | 65.90 | 83.60 | 61.30 | 77.80 | 4.30 |
| 42.00 | 59.80 | 27.10 | 14.90 | 0.35 | 58.30 | 83.00 | 54.20 | 77.20 | 3.73 |
| 53.10 | 61.80 | 34.40 | 18.70 | 0.35 | 73.70 | 85.70 | 68.70 | 79.90 | 4.72 |
| 39.00 | 60.90 | 25.50 | 13.50 | 0.35 | 54.20 | 84.60 | 50.40 | 78.70 | 3.41 |
| 31.20 | 57.80 | 20.20 | 11.00 | 0.35 | 43.30 | 79.90 | 40.20 | 74.20 | 2.64 |
| 27.10 | 64.10 | 17.50 | 9.60  | 0.35 | 37.70 | 89.10 | 35.20 | 83.20 | 2.26 |
| 51.00 | 50.20 | 33.00 | 18.00 | 0.35 | 70.90 | 69.80 | 65.10 | 64.10 | 4.32 |
| 30.20 | 55.20 | 19.50 | 10.70 | 0.35 | 42.00 | 76.90 | 38.80 | 71.00 | 2.56 |
| 44.10 | 56.90 | 28.90 | 15.20 | 0.35 | 61.20 | 78.97 | 56.70 | 73.16 | 3.72 |
| 47.10 | 56.40 | 30.70 | 16.40 | 0.35 | 65.40 | 78.30 | 60.60 | 72.60 | 4.17 |
| 47.20 | 57.80 | 30.60 | 16.60 | 0.35 | 65.50 | 80.10 | 60.80 | 74.40 | 3.95 |
| 43.00 | 60.50 | 28.20 | 14.80 | 0.35 | 59.70 | 84.00 | 55.60 | 78.20 | 3.71 |
| 41.60 | 59.80 | 27.20 | 14.60 | 0.35 | 58.10 | 83.50 | 54.00 | 77.60 | 3.68 |
| 49.20 | 61.10 | 32.20 | 17.00 | 0.35 | 68.40 | 85.00 | 63.70 | 79.10 | 4.26 |
| 35.40 | 57.30 | 23.00 | 12.40 | 0.35 | 49.10 | 79.40 | 45.60 | 73.80 | 2.94 |
| 30.10 | 54.50 | 19.60 | 10.50 | 0.35 | 41.80 | 75.70 | 38.60 | 69.90 | 2.40 |
| 51.40 | 62.70 | 34.00 | 17.40 | 0.34 | 71.40 | 87.10 | 66.60 | 81.20 | 4.55 |
| 39.00 | 61.30 | 25.70 | 13.30 | 0.34 | 39.70 | 81.50 | 36.90 | 75.80 | 3.25 |
| 31.00 | 54.40 | 20.10 | 10.90 | 0.35 | 54.20 | 85.20 | 50.50 | 79.40 | 2.52 |
| 36.80 | 55.10 | 23.70 | 13.10 | 0.36 | 43.10 | 75.60 | 39.80 | 69.80 | 2.99 |
| 44.40 | 56.90 | 29.30 | 15.10 | 0.34 | 61.60 | 78.90 | 57.10 | 73.10 | 3.80 |
| 46.30 | 59.20 | 30.30 | 16.00 | 0.35 | 64.30 | 82.20 | 59.80 | 76.50 | 4.02 |
| 51.40 | 59.30 | 33.50 | 17.90 | 0.35 | 71.40 | 82.40 | 66.30 | 76.50 | 4.33 |
| 53.20 | 57.10 | 34.80 | 18.40 | 0.35 | 73.90 | 79.40 | 68.50 | 73.60 | 4.56 |
| 48.50 | 59.30 | 31.40 | 17.10 | 0.35 | 67.30 | 82.30 | 62.60 | 76.50 | 4.12 |
| 48.40 | 58.50 | 31.70 | 16.70 | 0.35 | 67.20 | 81.30 | 62.40 | 75.50 | 4.30 |
| 41.00 | 63.20 | 26.40 | 14.60 | 0.36 | 56.90 | 87.70 | 53.10 | 81.80 | 3.54 |
| 49.50 | 57.20 | 31.60 | 17.90 | 0.36 | 68.70 | 79.40 | 63.70 | 73.60 | 4.13 |
| 48.00 | 59.50 | 31.40 | 16.60 | 0.35 | 66.70 | 82.70 | 62.00 | 76.80 | 4.25 |
| 41.00 | 52.10 | 26.20 | 14.80 | 0.36 | 56.90 | 72.30 | 52.40 | 66.60 | 3.39 |
| 35.90 | 55.80 | 22.90 | 13.00 | 0.36 | 49.90 | 77.60 | 46.20 | 71.90 | 2.95 |
| 41.00 | 57.60 | 26.00 | 15.00 | 0.37 | 57.00 | 80.10 | 52.80 | 74.20 | 3.42 |
| 43.60 | 58.30 | 28.20 | 15.40 | 0.35 | 60.60 | 81.00 | 56.20 | 75.10 | 3.81 |
| 48.30 | 57.00 | 31.20 | 17.10 | 0.35 | 67.10 | 79.20 | 62.20 | 73.40 | 4.15 |
| 33.40 | 57.40 | 21.30 | 12.10 | 0.36 | 46.40 | 79.70 | 43.00 | 73.90 | 2.76 |
| 32.30 | 55.40 | 20.60 | 11.70 | 0.36 | 44.90 | 77.00 | 41.50 | 71.20 | 2.73 |

|       |       |       |       |      |       |       |       |       |      |
|-------|-------|-------|-------|------|-------|-------|-------|-------|------|
| 34.70 | 62.00 | 22.10 | 12.60 | 0.36 | 48.20 | 86.10 | 44.90 | 80.20 | 2.85 |
| 45.10 | 62.20 | 29.10 | 16.00 | 0.35 | 62.60 | 86.30 | 58.40 | 80.60 | 3.88 |

| Desines_ra | Kaires_kojr | Desines_kc | Liemens_r | RRMI_raur | FFMI_adj | Baltymu_k | Baltymu_k | Mineralu_l | Mineralu_l |
|------------|-------------|------------|-----------|-----------|----------|-----------|-----------|------------|------------|
| 3.56       | 9.18        | 9.20       | 25.12     | 4.20      | 21.42    | 11.40     | 17.10     | 3.80       | 5.70       |
| 4.77       | 13.07       | 12.83      | 34.32     | 5.60      | 20.70    | 15.90     | 18.20     | 5.10       | 5.80       |
| 4.11       | 10.98       | 11.23      | 30.46     | 2.50      | 20.12    | 13.30     | 14.80     | 5.20       | 5.80       |
| 4.26       | 11.52       | 11.36      | 30.64     | 4.50      | 19.46    | 14.00     | 17.40     | 4.70       | 5.80       |
| 4.05       | 11.23       | 11.31      | 30.55     | 4.10      | 18.55    | 13.80     | 17.10     | 4.70       | 5.80       |
| 4.26       | 11.95       | 11.77      | 32.07     | 5.60      | 18.53    | 14.60     | 18.10     | 4.70       | 5.80       |
| 3.86       | 10.33       | 10.34      | 28.41     | 4.10      | 18.86    | 12.80     | 17.10     | 4.30       | 5.70       |
| 4.00       | 10.79       | 10.86      | 29.09     | 5.40      | 18.93    | 13.30     | 18.00     | 4.40       | 6.00       |
| 4.06       | 11.10       | 11.16      | 30.34     | 5.30      | 17.42    | 13.80     | 18.00     | 4.40       | 5.80       |
| 3.85       | 10.18       | 10.18      | 28.05     | 4.20      | 18.38    | 12.60     | 17.10     | 4.30       | 5.80       |
| 3.58       | 10.17       | 9.92       | 27.68     | 4.30      | 18.01    | 12.40     | 17.20     | 4.20       | 5.80       |
| 5.92       | 16.36       | 16.01      | 40.60     | 9.30      | 25.91    | 19.50     | 19.50     | 6.00       | 6.00       |
| 2.60       | 7.20        | 7.19       | 20.61     | 2.90      | 16.64    | 8.90      | 15.60     | 3.30       | 5.80       |
| 2.62       | 7.17        | 7.06       | 20.86     | 2.40      | 16.25    | 8.80      | 14.60     | 3.50       | 5.80       |
| 2.97       | 7.96        | 8.07       | 22.47     | 3.40      | 15.95    | 9.90      | 16.30     | 3.50       | 5.80       |
| 2.30       | 6.52        | 6.70       | 19.06     | 3.10      | 15.57    | 8.20      | 15.90     | 3.00       | 5.80       |
| 2.74       | 7.53        | 7.50       | 20.80     | 2.90      | 16.69    | 9.10      | 15.40     | 3.40       | 5.80       |
| 3.81       | 9.64        | 9.79       | 27.51     | 5.50      | 17.29    | 12.40     | 18.10     | 4.00       | 5.80       |
| 3.47       | 9.09        | 9.22       | 25.31     | 6.70      | 17.74    | 11.50     | 18.60     | 3.70       | 6.00       |
| 3.41       | 9.29        | 9.32       | 25.31     | 5.00      | 18.37    | 11.50     | 17.80     | 3.80       | 5.90       |
| 3.75       | 10.00       | 10.70      | 28.38     | 4.70      | 16.64    | 12.60     | 17.50     | 4.20       | 5.80       |
| 3.94       | 11.07       | 11.37      | 29.26     | 4.00      | 18.99    | 13.40     | 16.90     | 4.60       | 5.80       |
| 3.47       | 10.00       | 9.77       | 26.49     | 5.40      | 18.98    | 12.10     | 18.10     | 3.90       | 5.80       |
| 3.44       | 9.65        | 9.83       | 25.57     | 3.00      | 18.35    | 11.50     | 15.70     | 4.20       | 5.70       |
| 3.50       | 10.00       | 9.90       | 26.75     | 7.50      | 17.75    | 12.30     | 19.00     | 3.80       | 5.90       |
| 2.55       | 7.09        | 7.04       | 19.74     | 12.60     | 18.05    | 9.00      | 20.10     | 2.70       | 6.00       |
| 3.56       | 9.87        | 10.02      | 25.73     | 5.90      | 19.31    | 12.00     | 18.30     | 3.80       | 5.80       |
| 3.40       | 9.12        | 9.23       | 25.75     | 10.20     | 16.82    | 11.70     | 19.70     | 3.60       | 6.10       |
| 3.03       | 8.32        | 8.47       | 22.96     | 3.40      | 17.44    | 10.20     | 16.20     | 3.60       | 5.70       |
| 2.97       | 8.06        | 8.18       | 22.62     | 3.40      | 17.10    | 10.00     | 16.29     | 3.60       | 5.86       |
| 3.27       | 9.16        | 9.15       | 25.00     | 6.30      | 18.57    | 11.40     | 18.60     | 3.60       | 5.90       |
| 3.49       | 9.51        | 9.46       | 26.12     | 6.70      | 18.26    | 11.90     | 18.70     | 3.70       | 5.80       |
| 2.75       | 7.52        | 7.46       | 21.10     | 11.20     | 18.05    | 9.60      | 19.90     | 2.90       | 6.00       |
| 3.09       | 8.48        | 8.34       | 24.04     | 7.50      | 17.52    | 10.80     | 19.05     | 3.30       | 5.82       |
| 4.22       | 11.47       | 11.47      | 30.65     | 3.50      | 19.27    | 13.80     | 16.30     | 5.00       | 5.90       |
| 3.62       | 9.63        | 9.66       | 26.80     | 3.10      | 19.42    | 11.80     | 15.80     | 4.40       | 5.90       |
| 4.07       | 11.17       | 10.96      | 31.07     | 3.60      | 18.24    | 13.70     | 16.40     | 4.80       | 5.80       |
| 4.36       | 12.48       | 12.25      | 33.21     | 3.00      | 19.09    | 14.80     | 15.70     | 5.40       | 5.70       |
| 3.03       | 8.09        | 8.13       | 22.46     | 2.90      | 17.88    | 9.90      | 15.50     | 3.70       | 5.80       |
| 3.00       | 8.43        | 8.57       | 22.89     | 2.40      | 18.82    | 10.00     | 14.50     | 4.00       | 5.80       |
| 3.04       | 8.04        | 8.19       | 22.74     | 2.40      | 17.79    | 9.80      | 14.40     | 3.90       | 5.70       |
| 2.94       | 8.28        | 8.51       | 22.58     | 2.20      | 17.90    | 9.80      | 14.10     | 4.00       | 5.80       |
| 2.98       | 8.24        | 8.28       | 22.46     | 4.00      | 18.42    | 10.10     | 16.90     | 3.50       | 5.90       |
| 3.66       | 9.82        | 9.83       | 27.44     | 4.00      | 19.72    | 12.20     | 16.90     | 4.20       | 5.80       |
| 3.41       | 9.10        | 8.94       | 25.61     | 5.90      | 18.23    | 11.50     | 18.30     | 3.60       | 5.70       |
| 3.63       | 9.06        | 9.22       | 26.75     | 7.10      | 17.87    | 12.00     | 18.90     | 3.70       | 5.80       |

|      |       |       |       |       |       |       |       |      |      |
|------|-------|-------|-------|-------|-------|-------|-------|------|------|
| 3.36 | 9.42  | 9.36  | 25.29 | 10.60 | 19.40 | 11.70 | 19.80 | 3.50 | 5.90 |
| 2.52 | 6.79  | 6.84  | 19.43 | 11.50 | 18.05 | 8.80  | 20.00 | 2.60 | 5.90 |
| 4.09 | 11.45 | 11.51 | 29.98 | 3.50  | 19.47 | 13.20 | 16.40 | 4.60 | 5.70 |
| 2.99 | 7.90  | 7.98  | 23.24 | 5.20  | 17.39 | 10.20 | 17.90 | 3.40 | 6.00 |
| 2.53 | 7.16  | 7.05  | 20.29 | 4.40  | 16.35 | 8.90  | 17.20 | 3.10 | 6.00 |
| 2.67 | 7.07  | 7.01  | 20.38 | 3.00  | 16.58 | 8.80  | 15.60 | 3.20 | 5.70 |
| 2.89 | 8.18  | 8.14  | 22.67 | 3.70  | 16.32 | 10.00 | 16.60 | 3.50 | 5.80 |
| 3.83 | 9.81  | 9.97  | 28.16 | 4.30  | 18.46 | 12.50 | 17.20 | 4.20 | 5.80 |
| 3.94 | 10.28 | 10.20 | 27.94 | 4.50  | 19.22 | 12.70 | 17.40 | 4.20 | 5.80 |
| 3.99 | 11.04 | 11.12 | 28.80 | 4.70  | 18.75 | 13.30 | 17.50 | 4.50 | 5.90 |
| 3.22 | 9.46  | 9.43  | 23.55 | 4.30  | 19.23 | 11.00 | 17.20 | 3.70 | 5.80 |
| 4.84 | 12.44 | 12.62 | 34.48 | 3.70  | 19.92 | 15.50 | 16.60 | 5.40 | 5.80 |
| 4.47 | 11.72 | 11.78 | 32.70 | 3.50  | 17.98 | 14.50 | 16.30 | 5.20 | 5.90 |
| 4.36 | 11.58 | 11.63 | 32.26 | 3.10  | 18.46 | 14.20 | 15.80 | 5.20 | 5.80 |
| 4.33 | 11.30 | 11.32 | 31.51 | 4.70  | 17.83 | 14.20 | 17.60 | 4.70 | 5.80 |
| 4.77 | 13.15 | 12.94 | 34.73 | 2.60  | 19.36 | 15.40 | 14.90 | 6.00 | 5.80 |
| 3.68 | 9.51  | 9.62  | 27.14 | 4.30  | 18.33 | 12.10 | 17.20 | 4.10 | 5.80 |
| 3.48 | 9.91  | 9.88  | 26.84 | 8.50  | 17.18 | 12.30 | 19.30 | 3.70 | 5.80 |
| 5.04 | 12.93 | 13.29 | 35.94 | 2.50  | 17.82 | 15.80 | 14.80 | 6.10 | 5.70 |
| 5.80 | 15.79 | 16.14 | 40.34 | 3.40  | 25.45 | 18.70 | 16.23 | 6.60 | 5.73 |
| 3.29 | 8.83  | 8.65  | 23.38 | 6.40  | 20.16 | 10.80 | 18.60 | 3.40 | 5.80 |
| 3.55 | 9.30  | 9.40  | 25.42 | 5.00  | 19.64 | 11.60 | 17.80 | 3.80 | 5.80 |
| 4.12 | 11.35 | 11.28 | 29.89 | 3.70  | 20.22 | 13.60 | 16.60 | 4.70 | 5.70 |
| 4.22 | 11.89 | 11.89 | 31.32 | 2.90  | 20.08 | 14.10 | 15.60 | 5.20 | 5.80 |
| 3.77 | 9.96  | 10.22 | 28.66 | 5.50  | 17.53 | 12.80 | 18.10 | 4.20 | 5.90 |
| 3.74 | 10.54 | 10.40 | 27.55 | 3.90  | 19.85 | 12.60 | 16.90 | 4.30 | 5.80 |
| 3.92 | 10.35 | 10.42 | 28.41 | 5.40  | 18.62 | 12.90 | 18.00 | 4.20 | 5.80 |
| 2.76 | 7.19  | 7.11  | 19.99 | 7.70  | 20.04 | 9.10  | 19.00 | 2.90 | 6.10 |
| 3.60 | 9.59  | 9.55  | 25.55 | 5.60  | 20.17 | 11.80 | 18.20 | 3.80 | 5.90 |
| 3.80 | 9.97  | 10.17 | 28.15 | 5.80  | 18.12 | 12.70 | 18.20 | 4.10 | 5.90 |
| 3.46 | 9.49  | 9.39  | 25.86 | 8.60  | 18.36 | 11.90 | 19.40 | 3.60 | 5.90 |
| 4.24 | 10.46 | 10.47 | 30.91 | 3.80  | 17.40 | 13.50 | 16.70 | 4.70 | 5.80 |
| 4.58 | 11.89 | 11.97 | 31.85 | 3.90  | 21.54 | 14.50 | 16.80 | 5.00 | 5.80 |
| 3.79 | 10.23 | 10.42 | 27.60 | 4.80  | 18.25 | 12.60 | 17.60 | 4.20 | 5.90 |
| 3.30 | 9.35  | 9.41  | 25.57 | 4.50  | 18.03 | 11.50 | 17.40 | 3.80 | 5.70 |
| 4.50 | 11.52 | 11.56 | 32.95 | 4.10  | 17.25 | 14.60 | 17.00 | 5.00 | 5.80 |
| 5.11 | 13.28 | 13.45 | 35.99 | 5.70  | 19.38 | 16.60 | 18.20 | 5.30 | 5.80 |
| 2.77 | 7.77  | 7.84  | 21.36 | 2.20  | 18.46 | 9.20  | 14.00 | 3.80 | 5.80 |
| 2.72 | 7.96  | 7.85  | 20.71 | 8.20  | 19.37 | 9.60  | 19.20 | 3.00 | 6.00 |
| 4.44 | 12.28 | 12.03 | 32.30 | 2.90  | 20.70 | 14.50 | 15.60 | 5.40 | 5.80 |
| 4.30 | 11.63 | 11.47 | 32.14 | 3.30  | 17.70 | 14.20 | 16.10 | 5.10 | 5.80 |
| 3.77 | 10.56 | 10.43 | 29.49 | 3.70  | 18.01 | 13.00 | 16.60 | 4.60 | 5.90 |
| 3.22 | 9.08  | 8.87  | 26.24 | 3.30  | 17.39 | 11.30 | 16.20 | 4.00 | 5.70 |
| 4.03 | 10.66 | 10.69 | 28.61 | 4.60  | 19.23 | 13.10 | 17.50 | 4.30 | 5.70 |
| 4.43 | 11.80 | 11.94 | 42.17 | 3.30  | 18.62 | 14.40 | 16.10 | 5.20 | 5.80 |
| 5.02 | 13.37 | 13.50 | 35.83 | 3.70  | 20.25 | 16.30 | 16.60 | 5.70 | 5.80 |
| 3.25 | 9.51  | 9.57  | 24.71 | 2.60  | 18.67 | 11.00 | 14.90 | 4.30 | 5.80 |

|      |       |       |       |       |       |       |       |      |      |
|------|-------|-------|-------|-------|-------|-------|-------|------|------|
| 4.19 | 12.30 | 11.98 | 31.44 | 4.00  | 17.76 | 14.40 | 16.90 | 4.90 | 5.80 |
| 4.40 | 12.01 | 12.06 | 33.14 | 3.10  | 17.61 | 14.60 | 15.70 | 5.40 | 5.80 |
| 4.76 | 12.83 | 12.94 | 34.73 | 3.60  | 18.19 | 15.60 | 16.40 | 5.60 | 5.90 |
| 4.49 | 12.66 | 12.45 | 33.16 | 5.10  | 20.82 | 15.20 | 17.80 | 5.00 | 5.80 |
| 3.63 | 10.09 | 9.89  | 28.47 | 5.60  | 17.20 | 12.70 | 18.20 | 4.10 | 5.90 |
| 3.23 | 8.76  | 9.00  | 25.37 | 8.40  | 16.63 | 11.40 | 19.30 | 3.50 | 5.90 |
| 3.33 | 9.08  | 8.92  | 25.31 | 4.80  | 18.64 | 11.30 | 17.60 | 3.70 | 5.80 |
| 3.38 | 8.99  | 9.14  | 25.80 | 6.90  | 17.26 | 11.60 | 18.80 | 3.60 | 5.80 |
| 3.16 | 8.54  | 8.64  | 23.85 | 10.10 | 17.30 | 10.90 | 19.70 | 3.20 | 5.80 |
| 3.78 | 10.12 | 10.05 | 27.60 | 8.50  | 17.46 | 12.70 | 19.40 | 3.80 | 5.80 |
| 2.99 | 8.00  | 8.22  | 22.14 | 2.50  | 18.55 | 9.70  | 14.80 | 3.70 | 5.60 |
| 2.06 | 5.56  | 5.44  | 15.82 | 5.40  | 15.83 | 7.00  | 18.00 | 2.30 | 5.90 |
| 4.02 | 10.75 | 10.84 | 30.17 | 4.90  | 16.95 | 13.50 | 17.70 | 4.50 | 5.90 |
| 2.76 | 8.16  | 8.12  | 21.86 | 2.80  | 18.29 | 9.60  | 15.20 | 3.60 | 5.70 |
| 2.48 | 7.20  | 7.19  | 20.32 | 4.10  | 16.39 | 8.90  | 17.00 | 3.10 | 5.90 |
| 2.45 | 6.91  | 6.84  | 19.25 | 5.30  | 16.61 | 8.60  | 18.00 | 2.80 | 5.80 |
| 4.97 | 13.92 | 13.57 | 37.23 | 3.20  | 20.06 | 16.60 | 15.90 | 6.00 | 5.80 |
| 2.33 | 6.62  | 6.68  | 18.44 | 4.90  | 16.53 | 8.20  | 17.60 | 2.80 | 6.00 |
| 2.83 | 8.55  | 8.53  | 21.41 | 3.60  | 17.90 | 9.90  | 16.50 | 3.50 | 5.80 |
| 3.79 | 10.58 | 11.02 | 29.05 | 4.00  | 18.17 | 13.10 | 16.90 | 4.50 | 5.80 |
| 4.82 | 13.25 | 13.62 | 34.82 | 5.10  | 22.69 | 16.20 | 17.90 | 5.20 | 5.70 |
| 4.43 | 12.36 | 12.36 | 32.54 | 2.30  | 20.67 | 14.40 | 14.30 | 5.70 | 5.70 |
| 3.11 | 8.56  | 8.47  | 24.40 | 16.40 | 16.93 | 11.10 | 20.60 | 3.20 | 5.90 |
| 2.88 | 7.99  | 7.96  | 23.07 | 6.70  | 17.22 | 10.20 | 18.60 | 3.20 | 5.90 |
| 2.97 | 8.32  | 8.29  | 22.60 | 7.70  | 18.69 | 10.40 | 19.20 | 3.20 | 5.90 |
| 4.78 | 12.75 | 12.66 | 34.35 | 4.50  | 17.93 | 15.60 | 17.30 | 5.30 | 5.90 |
| 3.71 | 10.06 | 10.15 | 27.69 | 4.90  | 18.07 | 12.50 | 17.70 | 4.10 | 5.80 |
| 3.53 | 9.87  | 9.72  | 27.49 | 4.40  | 17.51 | 12.20 | 17.30 | 4.20 | 5.90 |
| 2.38 | 6.48  | 6.53  | 19.12 | 3.00  | 16.02 | 8.20  | 15.80 | 2.90 | 5.60 |
| 2.75 | 7.70  | 7.65  | 21.70 | 2.90  | 17.07 | 9.40  | 15.50 | 3.50 | 5.80 |
| 2.54 | 7.15  | 6.99  | 19.81 | 3.40  | 16.88 | 8.70  | 16.20 | 3.10 | 5.80 |
| 3.60 | 9.69  | 9.82  | 26.58 | 5.40  | 18.71 | 12.10 | 18.10 | 3.90 | 5.80 |
| 3.75 | 10.54 | 10.43 | 28.17 | 4.80  | 18.56 | 12.80 | 17.60 | 4.30 | 5.90 |
| 4.68 | 12.19 | 12.40 | 33.57 | 5.40  | 17.90 | 15.30 | 18.00 | 5.00 | 5.90 |
| 4.27 | 11.37 | 11.37 | 31.40 | 4.30  | 18.09 | 14.10 | 17.20 | 4.80 | 5.80 |
| 4.80 | 12.56 | 12.84 | 34.17 | 4.30  | 19.15 | 15.60 | 17.30 | 5.20 | 5.80 |
| 3.01 | 8.52  | 8.73  | 23.17 | 2.80  | 17.23 | 10.20 | 15.20 | 3.90 | 5.80 |
| 2.64 | 7.64  | 7.64  | 21.10 | 3.30  | 16.68 | 9.30  | 16.10 | 3.30 | 5.70 |
| 2.65 | 7.80  | 7.56  | 21.60 | 2.70  | 16.71 | 9.30  | 15.00 | 3.50 | 5.60 |
| 3.13 | 9.12  | 9.06  | 25.12 | 2.40  | 17.13 | 10.80 | 14.60 | 4.30 | 5.80 |
| 3.21 | 10.62 | 9.68  | 24.53 | 2.50  | 18.23 | 11.20 | 14.70 | 4.40 | 5.80 |
| 3.09 | 9.41  | 9.04  | 22.98 | 4.40  | 17.15 | 10.70 | 17.30 | 3.60 | 5.80 |
| 4.55 | 12.62 | 12.61 | 32.33 | 3.60  | 20.45 | 14.90 | 16.40 | 5.30 | 5.80 |
| 3.30 | 8.59  | 8.69  | 24.05 | 6.40  | 18.40 | 10.90 | 18.50 | 3.50 | 5.90 |
| 4.02 | 11.07 | 10.83 | 29.95 | 3.60  | 19.69 | 13.40 | 16.50 | 4.70 | 5.80 |
| 3.03 | 8.63  | 8.51  | 24.61 | 7.70  | 17.02 | 11.00 | 19.20 | 3.30 | 5.70 |
| 2.79 | 7.62  | 7.68  | 20.94 | 11.30 | 18.68 | 9.60  | 19.80 | 2.90 | 6.00 |

|      |       |       |       |       |       |       |       |      |      |
|------|-------|-------|-------|-------|-------|-------|-------|------|------|
| 3.78 | 10.10 | 10.23 | 27.79 | 3.70  | 17.99 | 12.40 | 16.50 | 4.40 | 5.90 |
| 2.45 | 6.51  | 6.68  | 18.88 | 2.60  | 18.26 | 8.10  | 14.90 | 3.20 | 5.90 |
| 2.07 | 6.03  | 5.81  | 16.46 | 11.60 | 18.93 | 7.50  | 20.00 | 2.20 | 5.90 |
| 2.63 | 7.01  | 7.05  | 19.81 | 3.10  | 17.18 | 8.70  | 15.90 | 3.10 | 5.70 |
| 2.85 | 8.01  | 8.06  | 21.96 | 4.20  | 16.16 | 9.80  | 17.00 | 3.40 | 5.90 |
| 2.89 | 7.59  | 7.71  | 22.15 | 8.00  | 17.10 | 9.90  | 19.20 | 3.00 | 5.80 |
| 2.96 | 7.66  | 7.85  | 22.03 | 3.40  | 16.31 | 9.70  | 16.20 | 3.40 | 5.70 |
| 3.89 | 11.04 | 10.85 | 29.15 | 3.60  | 22.65 | 13.20 | 16.50 | 4.60 | 5.80 |
| 3.98 | 10.59 | 10.43 | 29.35 | 3.40  | 20.58 | 13.00 | 16.20 | 4.60 | 5.70 |
| 4.68 | 12.70 | 12.89 | 34.25 | 5.20  | 20.03 | 15.70 | 17.90 | 5.20 | 5.90 |
| 4.67 | 12.73 | 12.68 | 32.76 | 4.90  | 23.65 | 15.30 | 17.70 | 5.00 | 5.80 |
| 4.35 | 11.16 | 11.28 | 30.22 | 4.80  | 21.22 | 13.90 | 17.60 | 4.60 | 5.80 |
| 3.72 | 9.88  | 9.93  | 26.94 | 4.60  | 20.19 | 12.20 | 17.40 | 4.10 | 5.80 |
| 4.75 | 12.77 | 12.86 | 33.60 | 5.60  | 21.52 | 15.60 | 18.10 | 5.00 | 5.80 |
| 3.37 | 9.09  | 9.06  | 25.47 | 5.10  | 18.54 | 11.40 | 17.80 | 3.80 | 5.90 |
| 2.63 | 7.10  | 7.32  | 20.51 | 3.70  | 16.07 | 9.00  | 16.60 | 3.10 | 5.70 |
| 2.26 | 6.35  | 6.44  | 17.88 | 7.70  | 19.16 | 8.10  | 19.10 | 2.50 | 5.90 |
| 4.33 | 12.20 | 12.28 | 31.98 | 2.10  | 20.99 | 14.10 | 13.90 | 5.80 | 5.70 |
| 2.54 | 7.14  | 7.10  | 19.46 | 3.10  | 17.89 | 8.60  | 15.80 | 3.20 | 5.90 |
| 3.71 | 10.36 | 10.30 | 28.61 | 3.48  | 18.09 | 12.60 | 16.26 | 4.50 | 5.81 |
| 4.18 | 11.17 | 11.21 | 29.87 | 3.30  | 20.19 | 13.50 | 16.20 | 4.80 | 5.70 |
| 3.66 | 11.82 | 10.74 | 30.63 | 3.70  | 18.30 | 13.60 | 16.60 | 4.70 | 5.70 |
| 3.74 | 9.86  | 9.86  | 28.42 | 4.90  | 16.65 | 12.60 | 17.70 | 4.10 | 5.80 |
| 3.67 | 9.99  | 9.96  | 26.70 | 3.70  | 18.73 | 12.20 | 17.50 | 4.10 | 5.90 |
| 4.26 | 11.55 | 11.45 | 32.09 | 5.30  | 16.83 | 14.40 | 17.90 | 4.80 | 6.00 |
| 2.96 | 8.39  | 8.27  | 23.04 | 3.60  | 16.58 | 10.20 | 16.50 | 3.50 | 5.70 |
| 2.37 | 7.04  | 6.98  | 19.81 | 2.90  | 16.52 | 8.50  | 15.40 | 3.20 | 5.80 |
| 4.64 | 12.70 | 12.16 | 32.55 | 6.30  | 21.73 | 15.20 | 18.50 | 4.80 | 5.90 |
| 3.21 | 8.97  | 8.94  | 26.13 | 4.10  | 16.24 | 8.30  | 17.00 | 2.80 | 5.70 |
| 2.47 | 7.17  | 7.05  | 20.59 | 5.40  | 15.06 | 11.50 | 18.10 | 3.70 | 5.80 |
| 2.96 | 8.90  | 8.90  | 23.56 | 2.90  | 17.50 | 8.80  | 15.40 | 3.30 | 5.80 |
| 3.75 | 10.56 | 10.47 | 28.53 | 3.50  | 19.01 | 12.70 | 16.30 | 4.50 | 5.80 |
| 4.05 | 10.80 | 10.92 | 30.02 | 4.30  | 17.45 | 13.50 | 17.30 | 4.50 | 5.80 |
| 4.33 | 12.13 | 12.28 | 33.23 | 4.30  | 15.92 | 14.90 | 17.20 | 5.10 | 5.90 |
| 4.60 | 12.50 | 12.68 | 34.16 | 3.60  | 17.26 | 15.30 | 16.40 | 5.40 | 5.80 |
| 4.11 | 11.75 | 11.92 | 30.70 | 4.30  | 18.55 | 14.10 | 17.20 | 4.70 | 5.70 |
| 4.34 | 11.52 | 11.63 | 30.61 | 4.00  | 19.06 | 14.00 | 16.90 | 4.80 | 5.80 |
| 3.54 | 9.44  | 9.48  | 27.10 | 6.60  | 16.56 | 12.10 | 18.60 | 3.80 | 5.90 |
| 4.10 | 12.24 | 12.10 | 31.13 | 3.60  | 19.22 | 14.20 | 16.40 | 5.00 | 5.80 |
| 4.33 | 11.15 | 11.59 | 30.68 | 4.40  | 18.12 | 14.00 | 17.30 | 4.70 | 5.80 |
| 3.41 | 10.04 | 9.91  | 26.65 | 2.40  | 18.61 | 11.40 | 14.50 | 4.50 | 5.70 |
| 2.85 | 8.79  | 8.63  | 22.98 | 3.20  | 17.88 | 10.30 | 16.00 | 3.70 | 5.80 |
| 3.38 | 10.55 | 10.33 | 25.11 | 3.70  | 16.47 | 11.80 | 16.60 | 4.20 | 5.90 |
| 3.80 | 10.29 | 10.28 | 28.01 | 4.00  | 18.97 | 12.60 | 16.80 | 4.40 | 5.90 |
| 4.15 | 10.96 | 11.06 | 31.88 | 3.50  | 16.97 | 13.90 | 16.40 | 4.90 | 5.80 |
| 2.73 | 7.76  | 7.92  | 21.83 | 3.60  | 16.67 | 9.60  | 16.50 | 3.40 | 5.80 |
| 2.73 | 7.54  | 7.51  | 20.99 | 3.10  | 16.89 | 9.20  | 15.80 | 3.40 | 5.80 |

|      |       |       |       |      |       |       |       |      |      |
|------|-------|-------|-------|------|-------|-------|-------|------|------|
| 2.77 | 8.32  | 8.23  | 22.72 | 5.80 | 15.80 | 10.20 | 18.20 | 3.30 | 5.90 |
| 3.77 | 10.86 | 10.66 | 29.24 | 5.90 | 17.73 | 13.30 | 18.30 | 4.20 | 5.80 |

| ENDOMOR | MEZOMOR | EKTOMOR | Riebalu_m | Riebalu_m | KMI_kuno_ | Baltymai_r | Angliavanc | Angliavanc | Baltymu_ti |
|---------|---------|---------|-----------|-----------|-----------|------------|------------|------------|------------|
| 5.30    | 6.70    | 1.71    | 12.10     | 18.20     | 24.90     | 83.20      | 274.48     | 48.02      | 14.56      |
| 4.34    | 5.36    | 2.81    | 12.40     | 14.20     | 24.70     | 120.80     | 483.63     | 49.14      | 12.28      |
| 5.58    | 6.37    | 1.86    | 23.90     | 26.60     | 27.50     | 152.10     | 294.33     | 43.85      | 22.65      |
| 4.45    | 5.34    | 2.99    | 13.70     | 17.00     | 23.70     | 110.40     | 242.88     | 41.60      | 18.92      |
| 4.37    | 5.09    | 3.27    | 14.90     | 18.40     | 23.20     | 117.70     | 399.85     | 48.00      | 14.13      |
| 3.94    | 4.72    | 3.76    | 11.60     | 14.40     | 22.40     | 91.50      | 331.77     | 51.09      | 14.09      |
| 4.54    | 5.41    | 3.07    | 13.70     | 18.30     | 23.10     | 77.50      | 369.72     | 58.41      | 12.25      |
| 4.19    | 5.12    | 3.39    | 10.80     | 14.60     | 22.30     | 215.40     | 889.71     | 58.43      | 14.14      |
| 3.79    | 4.45    | 4.16    | 11.40     | 14.90     | 21.20     | 102.30     | 485.51     | 55.19      | 11.63      |
| 4.40    | 5.22    | 3.30    | 13.30     | 18.00     | 22.50     | 141.60     | 735.71     | 66.25      | 12.75      |
| 4.30    | 5.08    | 3.46    | 12.70     | 17.70     | 21.90     | 121.50     | 297.71     | 44.14      | 18.01      |
| 4.78    | 6.43    | 0.95    | 9.10      | 9.10      | 28.90     | 133.70     | 603.21     | 48.43      | 10.73      |
| 4.21    | 4.48    | 3.12    | 13.70     | 24.00     | 20.80     | 44.90      | 117.31     | 36.17      | 13.83      |
| 4.43    | 4.55    | 2.99    | 16.50     | 27.40     | 21.40     | 56.10      | 128.73     | 40.27      | 17.54      |
| 3.96    | 3.67    | 3.86    | 12.90     | 21.20     | 19.90     | 65.00      | 225.83     | 48.66      | 14.01      |
| 3.89    | 3.97    | 3.64    | 11.80     | 22.80     | 19.00     | 78.10      | 197.44     | 39.14      | 15.49      |
| 4.23    | 4.46    | 3.13    | 14.20     | 24.10     | 21.00     | 109.00     | 377.51     | 56.96      | 16.45      |
| 3.88    | 4.65    | 4.14    | 10.00     | 14.60     | 20.50     | 104.00     | 424.77     | 44.20      | 10.82      |
| 3.88    | 4.88    | 4.04    | 7.50      | 12.20     | 19.90     | 155.20     | 528.68     | 51.41      | 15.09      |
| 4.32    | 5.31    | 3.39    | 10.10     | 15.60     | 21.30     | 166.80     | 750.88     | 53.41      | 11.86      |
| 3.84    | 4.42    | 4.28    | 12.00     | 16.60     | 20.50     | 119.20     | 513.49     | 53.70      | 12.47      |
| 4.56    | 5.37    | 2.99    | 15.00     | 18.90     | 23.60     | 132.30     | 436.24     | 48.99      | 14.86      |
| 4.33    | 5.39    | 3.28    | 9.80      | 14.60     | 21.90     | 175.00     | 452.18     | 45.19      | 17.48      |
| 4.98    | 5.73    | 2.71    | 17.10     | 23.40     | 23.60     | 129.50     | 469.79     | 42.08      | 11.59      |
| 3.72    | 4.69    | 4.25    | 7.20      | 11.10     | 20.00     | 116.00     | 378.14     | 47.02      | 14.42      |
| 3.86    | 5.36    | 4.20    | 3.10      | 6.90      | 17.90     | 122.90     | 450.32     | 47.81      | 13.05      |
| 4.33    | 5.50    | 3.22    | 8.90      | 13.60     | 21.90     | 64.90      | 314.01     | 55.57      | 11.49      |
| 3.36    | 4.33    | 4.93    | 5.00      | 8.40      | 18.40     | 120.90     | 483.25     | 55.18      | 13.81      |
| 4.20    | 4.41    | 3.14    | 13.60     | 21.60     | 21.50     | 90.60      | 300.35     | 49.74      | 15.01      |
| 4.12    | 4.25    | 3.30    | 13.00     | 21.17     | 21.00     | 90.60      | 300.35     | 49.74      | 15.01      |
| 4.18    | 5.30    | 3.56    | 7.90      | 12.90     | 20.80     | 112.50     | 533.86     | 55.23      | 11.64      |
| 3.97    | 5.02    | 3.83    | 7.80      | 12.30     | 20.50     | 163.70     | 366.51     | 36.52      | 16.31      |
| 3.85    | 5.27    | 4.19    | 3.70      | 7.70      | 18.40     | 87.60      | 390.59     | 53.89      | 12.09      |
| 3.83    | 4.92    | 4.21    | 6.30      | 11.11     | 19.17     | 87.60      | 390.59     | 53.89      | 12.09      |
| 4.79    | 5.54    | 2.70    | 17.90     | 21.10     | 24.80     | 104.30     | 377.39     | 43.02      | 11.89      |
| 5.20    | 6.09    | 2.25    | 17.20     | 23.00     | 24.70     | 194.80     | 502.78     | 46.13      | 17.87      |
| 4.44    | 5.03    | 3.19    | 17.10     | 20.50     | 23.30     | 94.20      | 269.51     | 45.80      | 16.01      |
| 4.86    | 5.43    | 2.69    | 22.00     | 23.40     | 25.70     | 143.00     | 304.43     | 35.58      | 16.75      |
| 4.47    | 4.93    | 2.67    | 15.40     | 24.10     | 22.60     | 97.30      | 239.92     | 45.82      | 18.59      |
| 4.92    | 5.72    | 1.99    | 18.90     | 27.50     | 24.80     | 90.20      | 302.94     | 52.67      | 15.68      |
| 4.80    | 5.26    | 2.39    | 19.10     | 28.10     | 23.80     | 87.80      | 276.86     | 49.08      | 15.57      |
| 4.91    | 5.41    | 2.27    | 20.10     | 29.00     | 24.30     | 79.70      | 219.23     | 50.88      | 18.50      |
| 4.61    | 5.57    | 2.66    | 11.20     | 18.80     | 20.60     | 112.30     | 401.30     | 51.48      | 14.41      |
| 4.70    | 5.65    | 2.29    | 13.60     | 18.80     | 22.80     | 89.30      | 311.65     | 52.33      | 15.00      |
| 4.12    | 5.17    | 3.69    | 8.60      | 13.70     | 20.70     | 106.40     | 352.61     | 49.46      | 14.92      |
| 3.76    | 4.72    | 3.98    | 7.40      | 11.70     | 19.60     | 91.70      | 331.92     | 55.63      | 15.37      |



|      |      |      |       |       |       |        |        |       |       |
|------|------|------|-------|-------|-------|--------|--------|-------|-------|
| 3.76 | 5.06 | 3.40 | 4.80  | 8.10  | 19.30 | 81.40  | 408.09 | 56.71 | 11.31 |
| 3.93 | 5.44 | 4.11 | 3.30  | 7.50  | 17.90 | 117.10 | 412.54 | 51.10 | 14.51 |
| 4.73 | 5.57 | 2.75 | 17.00 | 21.10 | 24.90 | 69.60  | 245.49 | 51.29 | 14.54 |
| 3.69 | 3.93 | 3.78 | 8.60  | 15.10 | 19.80 | 175.00 | 587.09 | 55.49 | 16.54 |
| 3.64 | 3.85 | 3.90 | 9.00  | 17.40 | 18.80 | 76.80  | 789.63 | 74.31 | 7.23  |
| 4.12 | 4.38 | 3.16 | 13.30 | 23.60 | 20.40 | 87.60  | 346.79 | 60.25 | 15.21 |
| 3.90 | 3.73 | 3.81 | 12.00 | 19.90 | 19.90 | 107.20 | 630.82 | 64.73 | 11.00 |
| 4.40 | 5.25 | 3.27 | 12.90 | 17.70 | 22.40 | 82.20  | 217.12 | 40.70 | 15.41 |
| 4.52 | 5.49 | 2.99 | 12.40 | 17.00 | 23.00 | 81.50  | 362.28 | 56.36 | 12.68 |
| 4.34 | 5.20 | 3.37 | 12.50 | 16.50 | 22.90 | 128.90 | 423.15 | 50.37 | 15.34 |
| 4.77 | 5.87 | 2.73 | 11.40 | 17.80 | 22.50 | 125.50 | 415.88 | 50.42 | 15.21 |
| 4.71 | 5.46 | 2.64 | 18.80 | 20.10 | 25.70 | 177.70 | 502.02 | 37.99 | 13.45 |
| 4.36 | 4.84 | 3.40 | 18.50 | 20.80 | 23.70 | 174.10 | 417.32 | 35.49 | 14.81 |
| 4.69 | 5.22 | 2.99 | 20.50 | 22.80 | 24.70 | 118.40 | 357.62 | 40.36 | 13.36 |
| 4.00 | 4.62 | 3.83 | 13.40 | 16.60 | 22.20 | 163.10 | 483.78 | 44.21 | 14.90 |
| 5.16 | 5.65 | 2.43 | 27.20 | 26.30 | 27.40 | 151.00 | 351.62 | 34.78 | 14.94 |
| 4.45 | 5.31 | 3.27 | 12.60 | 17.90 | 22.20 | 94.00  | 436.31 | 52.91 | 11.40 |
| 3.48 | 4.41 | 4.68 | 6.30  | 9.90  | 19.20 | 172.50 | 494.75 | 48.48 | 16.91 |
| 4.83 | 5.08 | 3.32 | 28.40 | 26.60 | 26.70 | 124.70 | 131.02 | 14.93 | 14.21 |
| 5.96 | 7.30 | 0.27 | 24.70 | 21.44 | 32.94 | 142.80 | 308.45 | 34.32 | 15.89 |
| 4.59 | 6.02 | 2.76 | 7.40  | 12.70 | 21.90 | 119.80 | 368.22 | 47.62 | 15.49 |
| 4.63 | 5.82 | 2.82 | 10.20 | 15.60 | 22.60 | 96.40  | 307.81 | 48.02 | 15.04 |
| 4.93 | 5.89 | 2.36 | 16.30 | 19.90 | 25.20 | 92.00  | 229.69 | 43.23 | 17.32 |
| 5.24 | 6.03 | 2.14 | 21.60 | 23.90 | 26.70 | 156.40 | 643.96 | 55.85 | 13.56 |
| 3.86 | 4.62 | 4.02 | 10.30 | 14.50 | 20.70 | 151.90 | 559.45 | 54.86 | 14.90 |
| 4.94 | 5.99 | 2.58 | 14.20 | 19.10 | 24.60 | 112.30 | 453.98 | 53.72 | 13.29 |
| 4.16 | 5.08 | 3.51 | 10.60 | 14.80 | 21.90 | 154.80 | 433.83 | 41.87 | 14.94 |
| 4.61 | 6.25 | 2.75 | 5.20  | 10.90 | 20.50 | 154.80 | 518.87 | 49.66 | 14.81 |
| 4.61 | 5.89 | 2.68 | 9.20  | 14.20 | 22.70 | 131.00 | 471.75 | 51.20 | 14.22 |
| 3.90 | 4.75 | 3.70 | 9.60  | 13.80 | 20.60 | 120.10 | 408.64 | 51.12 | 15.03 |
| 3.81 | 4.96 | 4.02 | 6.00  | 9.80  | 20.00 | 129.90 | 459.13 | 51.98 | 14.71 |
| 4.20 | 4.72 | 3.73 | 15.70 | 19.50 | 22.40 | 315.20 | 308.04 | 28.08 | 28.73 |
| 5.13 | 6.24 | 1.86 | 16.70 | 19.30 | 26.70 | 155.00 | 389.42 | 36.75 | 14.62 |
| 4.23 | 5.08 | 3.52 | 11.60 | 16.20 | 21.90 | 126.10 | 416.74 | 41.81 | 12.65 |
| 4.38 | 5.28 | 3.44 | 11.40 | 17.20 | 21.50 | 107.10 | 382.81 | 42.91 | 12.01 |
| 3.97 | 4.41 | 3.99 | 15.90 | 18.50 | 22.40 | 81.60  | 291.13 | 45.56 | 12.76 |
| 3.95 | 4.71 | 3.52 | 12.80 | 14.10 | 23.70 | 158.00 | 402.63 | 40.74 | 15.99 |
| 4.99 | 5.90 | 1.88 | 19.40 | 29.50 | 24.70 | 40.10  | 242.18 | 65.17 | 10.79 |
| 4.35 | 5.87 | 3.26 | 5.10  | 10.20 | 20.10 | 41.30  | 213.98 | 56.87 | 10.98 |
| 5.36 | 6.21 | 1.90 | 22.30 | 23.90 | 27.50 | 95.00  | 346.60 | 47.98 | 13.15 |
| 4.44 | 4.86 | 3.38 | 19.50 | 22.10 | 23.70 | 211.60 | 416.25 | 31.67 | 16.10 |
| 4.45 | 5.10 | 3.30 | 15.70 | 20.00 | 22.90 | 149.50 | 207.93 | 31.88 | 22.92 |
| 4.62 | 5.28 | 3.31 | 15.20 | 21.70 | 22.10 | 133.00 | 199.99 | 26.89 | 17.88 |
| 4.45 | 5.41 | 3.07 | 12.50 | 16.70 | 23.10 | 126.20 | 409.36 | 49.79 | 15.35 |
| 4.66 | 5.23 | 2.98 | 19.80 | 22.10 | 24.70 | 76.60  | 441.63 | 62.64 | 10.87 |
| 4.75 | 5.49 | 2.55 | 19.90 | 20.20 | 26.40 | 117.90 | 336.31 | 43.40 | 15.22 |
| 4.86 | 5.31 | 2.28 | 19.40 | 26.20 | 24.70 | 95.70  | 453.44 | 60.29 | 12.72 |

|      |      |      |       |       |       |        |        |       |       |
|------|------|------|-------|-------|-------|--------|--------|-------|-------|
| 4.13 | 4.66 | 3.70 | 15.90 | 18.70 | 22.80 | 87.40  | 239.01 | 42.36 | 15.49 |
| 4.46 | 4.82 | 3.42 | 21.50 | 23.10 | 24.20 | 123.40 | 424.44 | 48.83 | 14.20 |
| 4.31 | 4.74 | 3.41 | 19.70 | 20.70 | 24.30 | 211.10 | 571.95 | 37.17 | 13.72 |
| 4.54 | 5.58 | 2.59 | 13.30 | 15.50 | 25.00 | 94.00  | 362.02 | 43.92 | 11.41 |
| 3.78 | 4.52 | 4.23 | 10.00 | 14.30 | 20.40 | 132.10 | 501.44 | 48.80 | 12.86 |
| 3.46 | 4.38 | 4.83 | 5.90  | 10.00 | 18.40 | 67.20  | 421.22 | 54.30 | 8.67  |
| 4.46 | 5.50 | 3.22 | 10.40 | 16.20 | 21.70 | 117.40 | 330.76 | 39.44 | 13.99 |
| 3.73 | 4.66 | 4.34 | 7.30  | 11.90 | 19.40 | 69.90  | 392.30 | 50.55 | 9.01  |
| 3.55 | 4.69 | 4.63 | 4.70  | 8.50  | 18.40 | 126.00 | 370.18 | 43.91 | 14.94 |
| 3.51 | 4.45 | 4.56 | 6.50  | 9.90  | 19.60 | 111.70 | 516.67 | 61.35 | 13.26 |
| 4.78 | 5.59 | 2.17 | 17.50 | 26.70 | 24.10 | 79.80  | 150.31 | 33.53 | 17.80 |
| 3.21 | 3.92 | 4.19 | 5.70  | 14.70 | 16.60 | 106.30 | 283.12 | 39.41 | 14.80 |
| 3.76 | 4.33 | 4.26 | 12.10 | 15.80 | 20.90 | 120.60 | 450.83 | 44.11 | 11.80 |
| 4.58 | 5.30 | 2.40 | 15.80 | 25.00 | 23.20 | 57.00  | 196.46 | 46.54 | 13.51 |
| 3.73 | 3.94 | 3.78 | 9.70  | 18.50 | 19.10 | 67.80  | 198.73 | 43.47 | 14.84 |
| 3.47 | 3.93 | 4.02 | 7.20  | 15.00 | 18.30 | 82.50  | 194.95 | 38.45 | 16.26 |
| 4.90 | 5.51 | 2.49 | 23.50 | 22.50 | 27.20 | 143.60 | 336.47 | 31.02 | 13.24 |
| 3.50 | 4.01 | 3.84 | 7.50  | 16.10 | 18.20 | 51.80  | 117.03 | 35.43 | 15.67 |
| 4.16 | 4.65 | 2.98 | 12.30 | 20.50 | 21.50 | 92.50  | 203.46 | 58.13 | 26.42 |
| 4.36 | 5.06 | 3.32 | 14.60 | 18.90 | 22.60 | 109.70 | 444.39 | 50.35 | 12.42 |
| 4.91 | 6.17 | 1.78 | 14.00 | 15.50 | 27.10 | 127.20 | 201.49 | 25.65 | 16.19 |
| 5.85 | 6.59 | 1.61 | 28.90 | 28.70 | 29.40 | 69.30  | 475.45 | 55.79 | 8.13  |
| 3.23 | 4.40 | 5.18 | 2.90  | 5.40  | 17.60 | 124.60 | 400.02 | 48.32 | 15.05 |
| 3.90 | 4.97 | 4.19 | 6.70  | 12.20 | 18.90 | 128.60 | 464.29 | 50.48 | 13.99 |
| 4.15 | 5.46 | 3.57 | 5.90  | 10.90 | 19.90 | 76.10  | 204.05 | 42.43 | 15.82 |
| 3.94 | 4.44 | 3.86 | 15.50 | 17.20 | 23.00 | 172.00 | 315.28 | 35.48 | 19.35 |
| 4.17 | 5.01 | 3.64 | 11.20 | 15.90 | 21.60 | 126.50 | 463.64 | 48.85 | 13.33 |
| 4.17 | 4.89 | 3.70 | 12.30 | 17.40 | 21.30 | 97.50  | 355.92 | 48.53 | 13.29 |
| 3.98 | 4.25 | 3.40 | 12.10 | 23.30 | 19.50 | 142.90 | 613.26 | 54.45 | 12.68 |
| 4.31 | 4.60 | 2.99 | 14.70 | 24.20 | 21.50 | 84.00  | 398.05 | 50.59 | 10.62 |
| 4.00 | 4.46 | 3.22 | 11.50 | 21.50 | 20.20 | 53.00  | 256.56 | 44.90 | 9.32  |
| 4.26 | 5.28 | 3.40 | 9.80  | 14.60 | 21.60 | 195.00 | 475.73 | 40.07 | 16.45 |
| 4.28 | 5.15 | 3.38 | 11.70 | 16.10 | 22.20 | 155.00 | 459.95 | 38.38 | 12.93 |
| 3.75 | 4.35 | 4.07 | 12.60 | 14.80 | 22.20 | 132.00 | 443.73 | 44.35 | 13.21 |
| 4.17 | 4.80 | 3.59 | 14.60 | 17.80 | 22.70 | 208.00 | 404.18 | 43.19 | 22.22 |
| 4.29 | 4.98 | 3.23 | 15.90 | 17.60 | 24.20 | 146.00 | 284.08 | 38.74 | 19.89 |
| 4.47 | 4.57 | 2.94 | 16.70 | 24.90 | 22.40 | 62.80  | 153.25 | 43.20 | 17.70 |
| 4.08 | 4.26 | 3.34 | 12.80 | 22.10 | 20.50 | 85.10  | 346.00 | 57.54 | 14.15 |
| 4.42 | 4.59 | 2.97 | 15.60 | 25.20 | 21.70 | 62.00  | 298.71 | 66.30 | 13.76 |
| 4.70 | 4.59 | 2.89 | 20.80 | 28.10 | 23.40 | 49.40  | 240.65 | 56.98 | 11.71 |
| 4.87 | 5.10 | 2.46 | 20.50 | 26.90 | 24.60 | 73.60  | 161.94 | 47.52 | 21.59 |
| 3.84 | 3.82 | 3.77 | 10.90 | 17.60 | 20.30 | 93.00  | 335.46 | 50.49 | 13.99 |
| 4.94 | 5.80 | 2.31 | 18.60 | 20.50 | 26.20 | 80.30  | 319.42 | 47.96 | 12.06 |
| 4.16 | 5.31 | 3.61 | 7.50  | 12.70 | 20.40 | 121.80 | 616.00 | 54.70 | 10.82 |
| 4.88 | 5.76 | 2.53 | 16.70 | 20.50 | 24.80 | 99.00  | 234.20 | 41.95 | 17.72 |
| 3.66 | 4.67 | 4.53 | 6.20  | 10.80 | 18.70 | 123.60 | 365.17 | 42.30 | 14.32 |
| 3.98 | 5.49 | 3.89 | 3.70  | 7.60  | 18.90 | 110.80 | 301.41 | 35.00 | 12.87 |

|      |      |      |       |       |       |        |        |       |       |
|------|------|------|-------|-------|-------|--------|--------|-------|-------|
| 4.51 | 5.20 | 3.26 | 15.10 | 20.10 | 22.70 | 162.60 | 498.10 | 43.93 | 14.35 |
| 4.55 | 5.70 | 2.08 | 14.10 | 26.00 | 22.60 | 71.10  | 313.50 | 48.21 | 10.94 |
| 4.33 | 6.14 | 3.54 | 2.80  | 7.50  | 18.10 | 124.10 | 299.94 | 37.07 | 15.34 |
| 4.15 | 4.72 | 2.94 | 12.50 | 22.90 | 20.80 | 74.00  | 329.91 | 49.48 | 11.10 |
| 3.72 | 3.56 | 4.04 | 10.40 | 18.10 | 19.20 | 83.20  | 227.72 | 32.92 | 12.02 |
| 3.79 | 4.93 | 4.41 | 5.40  | 10.50 | 18.30 | 71.80  | 153.83 | 32.07 | 14.97 |
| 4.01 | 3.94 | 3.63 | 12.90 | 21.60 | 20.20 | 74.80  | 242.38 | 49.77 | 15.35 |
| 4.52 | 5.29 | 0.10 | 16.20 | 16.20 | 20.30 | 125.80 | 329.56 | 32.92 | 12.56 |
| 5.23 | 6.26 | 2.01 | 17.30 | 21.50 | 25.90 | 68.70  | 250.94 | 49.89 | 13.67 |
| 4.27 | 5.16 | 3.03 | 13.30 | 15.10 | 24.30 | 218.50 | 446.00 | 36.85 | 18.06 |
| 5.24 | 6.70 | 1.20 | 13.70 | 15.90 | 27.80 | 139.80 | 429.56 | 44.39 | 14.45 |
| 4.85 | 6.05 | 2.20 | 12.90 | 16.40 | 25.20 | 141.30 | 348.97 | 37.78 | 15.29 |
| 4.80 | 5.96 | 2.47 | 11.90 | 17.00 | 23.70 | 148.10 | 438.08 | 43.84 | 14.82 |
| 4.56 | 5.73 | 2.39 | 12.30 | 14.30 | 25.40 | 82.00  | 385.21 | 56.43 | 12.02 |
| 4.35 | 5.38 | 3.33 | 9.90  | 15.40 | 21.40 | 95.60  | 278.96 | 46.31 | 15.87 |
| 3.79 | 3.86 | 3.82 | 10.90 | 21.10 | 19.20 | 63.20  | 334.95 | 52.85 | 9.98  |
| 4.56 | 6.21 | 3.10 | 4.60  | 10.90 | 19.30 | 88.20  | 200.11 | 34.55 | 15.23 |
| 6.12 | 6.91 | 1.35 | 30.70 | 30.20 | 30.30 | 93.60  | 279.27 | 34.45 | 11.55 |
| 4.29 | 5.15 | 2.56 | 12.60 | 23.10 | 21.60 | 93.60  | 229.75 | 36.09 | 14.70 |
| 4.59 | 5.26 | 3.16 | 16.30 | 21.03 | 23.14 | 89.60  | 276.90 | 43.11 | 13.95 |
| 5.11 | 6.03 | 2.22 | 18.10 | 21.70 | 25.80 | 151.00 | 405.74 | 46.40 | 17.27 |
| 4.45 | 5.11 | 3.28 | 16.30 | 19.90 | 23.40 | 171.60 | 516.25 | 40.85 | 13.58 |
| 3.81 | 4.40 | 4.32 | 11.40 | 16.00 | 20.30 | 202.00 | 573.39 | 47.97 | 16.89 |
| 4.43 | 5.36 | 3.17 | 14.60 | 21.00 | 22.20 | 99.00  | 355.45 | 48.84 | 13.60 |
| 3.59 | 4.08 | 4.49 | 12.10 | 15.00 | 21.00 | 159.00 | 532.28 | 46.84 | 13.97 |
| 4.00 | 3.89 | 3.66 | 12.70 | 20.60 | 20.40 | 94.00  | 301.71 | 46.59 | 14.57 |
| 4.17 | 4.51 | 3.11 | 13.40 | 24.30 | 20.50 | 86.00  | 288.00 | 46.09 | 13.81 |
| 4.54 | 5.80 | 2.36 | 10.60 | 12.90 | 25.00 | 199.00 | 451.00 | 55.59 | 24.53 |
| 3.73 | 4.41 | 4.53 | 9.00  | 18.50 | 19.00 | 104.00 | 278.47 | 42.05 | 15.71 |
| 4.00 | 3.64 | 3.81 | 9.40  | 14.80 | 19.20 | 198.00 | 784.24 | 59.10 | 14.89 |
| 4.40 | 4.55 | 2.98 | 13.90 | 24.40 | 19.30 | 60.00  | 330.53 | 51.55 | 9.32  |
| 4.83 | 5.64 | 2.74 | 16.50 | 21.10 | 24.10 | 172.00 | 310.40 | 32.07 | 17.76 |
| 4.07 | 4.66 | 3.84 | 13.90 | 17.80 | 21.90 | 98.00  | 460.14 | 49.69 | 10.59 |
| 3.52 | 3.73 | 4.73 | 15.30 | 17.60 | 21.00 | 73.00  | 363.47 | 46.05 | 9.26  |
| 4.09 | 4.40 | 3.85 | 19.20 | 20.60 | 23.30 | 111.00 | 445.35 | 48.04 | 11.94 |
| 4.28 | 5.00 | 3.38 | 14.50 | 17.70 | 23.10 | 93.00  | 507.24 | 68.79 | 12.60 |
| 4.50 | 5.28 | 3.04 | 15.50 | 18.70 | 23.90 | 135.00 | 348.19 | 34.90 | 13.53 |
| 3.54 | 4.29 | 4.70 | 8.00  | 12.30 | 19.20 | 129.00 | 187.58 | 24.52 | 16.92 |
| 4.69 | 5.42 | 2.83 | 17.80 | 20.60 | 24.70 | 138.00 | 464.63 | 52.75 | 15.62 |
| 4.15 | 4.82 | 3.60 | 14.00 | 17.30 | 22.60 | 166.00 | 544.42 | 38.01 | 11.60 |
| 5.02 | 5.35 | 2.26 | 21.80 | 27.70 | 25.40 | 94.00  | 294.61 | 49.62 | 15.83 |
| 4.35 | 4.71 | 2.87 | 14.40 | 22.40 | 22.20 | 93.00  | 338.47 | 44.54 | 12.18 |
| 4.05 | 3.43 | 3.93 | 14.20 | 19.90 | 20.90 | 113.00 | 342.91 | 38.27 | 12.57 |
| 4.64 | 5.52 | 2.91 | 14.20 | 19.00 | 23.30 | 116.00 | 399.58 | 48.43 | 14.06 |
| 4.16 | 4.54 | 3.84 | 17.60 | 20.80 | 22.50 | 124.00 | 237.05 | 31.88 | 16.74 |
| 3.95 | 4.04 | 3.56 | 11.80 | 20.30 | 20.10 | 107.00 | 484.75 | 53.79 | 11.90 |
| 4.18 | 4.46 | 3.14 | 13.40 | 23.00 | 20.90 | 175.00 | 437.65 | 43.15 | 17.26 |

|      |      |      |      |       |       |        |        |       |       |
|------|------|------|------|-------|-------|--------|--------|-------|-------|
| 3.39 | 3.03 | 4.70 | 7.80 | 13.90 | 18.10 | 183.00 | 652.59 | 43.33 | 12.13 |
| 3.81 | 4.60 | 4.09 | 9.90 | 13.70 | 21.00 | 152.00 | 397.74 | 39.88 | 15.26 |

| Riebalu_tie | Enenerginė | Baltymai_ξ | Angliavand. | Riebalai_g | Energ_vert | ENDOMOR | MEZOMOR | EKTOMORI | ENDOMOR |
|-------------|------------|------------|-------------|------------|------------|---------|---------|----------|---------|
| 37.42       | 2286.41    | 1.25       | 4.13        | 1.43       | 34.38      | 3       | 3       | 1        | 2       |
| 38.58       | 3936.76    | 1.38       | 5.54        | 1.93       | 45.09      | 2       | 3       | 1        | 1       |
| 33.50       | 2685.18    | 1.69       | 3.27        | 1.11       | 29.84      | 3       | 3       | 1        | 2       |
| 39.48       | 2335.29    | 1.37       | 3.02        | 1.27       | 29.05      | 2       | 3       | 1        | 1       |
| 37.87       | 3332.20    | 1.46       | 4.95        | 1.74       | 41.24      | 2       | 3       | 2        | 1       |
| 34.82       | 2597.28    | 1.13       | 4.11        | 1.25       | 32.18      | 2       | 2       | 2        | 1       |
| 29.34       | 2531.85    | 1.04       | 4.94        | 1.10       | 33.85      | 2       | 3       | 2        | 1       |
| 27.43       | 6091.14    | 2.91       | 12.04       | 2.51       | 82.42      | 2       | 3       | 2        | 1       |
| 33.18       | 3518.96    | 1.34       | 6.35        | 1.70       | 46.00      | 2       | 2       | 2        | 1       |
| 21.00       | 4441.92    | 1.92       | 9.98        | 1.41       | 60.27      | 2       | 3       | 2        | 1       |
| 37.84       | 2697.66    | 1.69       | 4.14        | 1.58       | 37.52      | 2       | 3       | 2        | 1       |
| 40.83       | 4981.70    | 1.34       | 6.03        | 2.26       | 49.82      | 2       | 3       | 1        | 1       |
| 50.00       | 1297.33    | 0.78       | 2.05        | 1.26       | 22.68      | 2       | 2       | 2        | 1       |
| 42.19       | 1278.85    | 0.93       | 2.13        | 0.99       | 21.21      | 2       | 2       | 1        | 1       |
| 37.32       | 1856.31    | 1.07       | 3.71        | 1.27       | 30.53      | 2       | 2       | 2        | 1       |
| 45.37       | 2018.01    | 1.51       | 3.82        | 1.97       | 39.03      | 2       | 2       | 2        | 1       |
| 26.59       | 2650.95    | 1.85       | 6.41        | 1.33       | 45.01      | 2       | 2       | 2        | 1       |
| 44.98       | 3843.72    | 1.52       | 6.20        | 2.80       | 56.11      | 2       | 2       | 2        | 1       |
| 33.50       | 4113.66    | 2.52       | 8.57        | 2.48       | 66.67      | 2       | 2       | 2        | 1       |
| 34.73       | 5623.62    | 2.58       | 11.62       | 3.36       | 87.05      | 2       | 3       | 2        | 1       |
| 33.84       | 3825.18    | 1.65       | 7.12        | 1.99       | 53.05      | 2       | 2       | 2        | 1       |
| 36.15       | 3561.62    | 1.67       | 5.51        | 1.81       | 44.97      | 2       | 3       | 1        | 1       |
| 37.33       | 4002.79    | 2.61       | 6.75        | 2.48       | 59.74      | 2       | 3       | 2        | 1       |
| 46.33       | 4466.09    | 1.77       | 6.42        | 3.14       | 61.01      | 2       | 3       | 1        | 1       |
| 38.56       | 3216.85    | 1.79       | 5.84        | 2.13       | 49.72      | 2       | 2       | 2        | 1       |
| 39.13       | 3767.41    | 2.74       | 10.05       | 3.66       | 84.09      | 2       | 3       | 2        | 1       |
| 32.93       | 2260.14    | 0.99       | 4.80        | 1.26       | 34.56      | 2       | 3       | 2        | 1       |
| 31.02       | 3503.24    | 2.03       | 8.12        | 2.03       | 58.88      | 2       | 2       | 2        | 1       |
| 35.25       | 2415.16    | 1.44       | 4.77        | 1.50       | 38.34      | 2       | 2       | 2        | 1       |
| 35.25       | 2415.16    | 1.48       | 4.89        | 1.54       | 39.33      | 2       | 2       | 2        | 1       |
| 33.13       | 3866.59    | 1.83       | 8.69        | 2.32       | 62.97      | 2       | 3       | 2        | 1       |
| 47.17       | 4014.48    | 2.57       | 5.76        | 3.31       | 63.12      | 2       | 3       | 2        | 1       |
| 34.02       | 2899.09    | 1.82       | 8.10        | 2.27       | 60.15      | 2       | 3       | 2        | 1       |
| 34.02       | 2899.09    | 1.54       | 6.89        | 1.93       | 51.13      | 2       | 2       | 2        | 1       |
| 45.09       | 3508.97    | 1.23       | 4.45        | 2.07       | 41.33      | 2       | 3       | 1        | 1       |
| 36.00       | 4360.04    | 2.60       | 6.71        | 2.33       | 58.21      | 3       | 3       | 1        | 2       |
| 38.19       | 2353.83    | 1.13       | 3.24        | 1.20       | 28.26      | 2       | 3       | 2        | 1       |
| 47.67       | 3422.55    | 1.52       | 3.24        | 1.93       | 36.37      | 2       | 3       | 1        | 1       |
| 35.59       | 2094.46    | 1.53       | 3.76        | 1.30       | 32.83      | 2       | 2       | 1        | 1       |
| 31.65       | 2300.90    | 1.31       | 4.40        | 1.18       | 33.44      | 2       | 3       | 1        | 1       |
| 35.34       | 2256.21    | 1.29       | 4.07        | 1.30       | 33.18      | 2       | 3       | 1        | 1       |
| 30.63       | 1723.69    | 1.15       | 3.16        | 0.85       | 24.87      | 2       | 3       | 1        | 1       |
| 34.11       | 3117.92    | 1.88       | 6.73        | 1.98       | 52.31      | 2       | 3       | 1        | 1       |
| 32.66       | 2382.04    | 1.24       | 4.32        | 1.20       | 32.99      | 2       | 3       | 1        | 1       |
| 35.62       | 2851.61    | 1.70       | 5.62        | 1.80       | 45.48      | 2       | 3       | 2        | 1       |
| 29.00       | 2386.48    | 1.45       | 5.24        | 1.21       | 37.64      | 2       | 2       | 2        | 1       |

|       |         |      |       |      |       |   |   |   |   |
|-------|---------|------|-------|------|-------|---|---|---|---|
| 31.98 | 2878.38 | 1.38 | 6.91  | 1.73 | 48.70 | 2 | 3 | 2 | 1 |
| 34.39 | 3229.47 | 2.66 | 9.38  | 2.80 | 73.40 | 2 | 3 | 2 | 1 |
| 34.17 | 1914.71 | 0.86 | 3.04  | 0.90 | 23.73 | 2 | 3 | 1 | 1 |
| 28.01 | 4232.03 | 3.06 | 10.28 | 2.31 | 74.12 | 2 | 2 | 2 | 1 |
| 18.46 | 4250.60 | 1.49 | 15.27 | 1.69 | 82.22 | 2 | 2 | 2 | 1 |
| 24.54 | 2302.46 | 1.54 | 6.08  | 1.10 | 40.39 | 2 | 2 | 2 | 1 |
| 24.26 | 3898.05 | 1.78 | 10.46 | 1.74 | 64.64 | 2 | 2 | 2 | 1 |
| 43.88 | 2133.61 | 1.13 | 2.99  | 1.43 | 29.35 | 2 | 3 | 2 | 1 |
| 30.96 | 2571.34 | 1.12 | 4.97  | 1.21 | 35.27 | 2 | 3 | 1 | 1 |
| 34.29 | 3360.61 | 1.70 | 5.58  | 1.69 | 44.28 | 2 | 3 | 2 | 1 |
| 34.37 | 3299.39 | 1.96 | 6.50  | 1.97 | 51.55 | 2 | 3 | 1 | 1 |
| 48.56 | 5285.81 | 1.90 | 5.37  | 3.05 | 56.59 | 2 | 3 | 1 | 1 |
| 49.71 | 4703.84 | 1.96 | 4.70  | 2.93 | 52.97 | 2 | 2 | 2 | 1 |
| 46.27 | 3544.14 | 1.32 | 3.98  | 2.03 | 39.42 | 2 | 3 | 1 | 1 |
| 40.89 | 4377.08 | 2.02 | 5.98  | 2.46 | 54.10 | 2 | 2 | 2 | 1 |
| 50.29 | 4044.27 | 1.46 | 3.40  | 2.19 | 39.15 | 3 | 3 | 1 | 2 |
| 35.69 | 3298.39 | 1.34 | 6.21  | 1.86 | 46.92 | 2 | 3 | 2 | 1 |
| 34.61 | 4081.70 | 2.71 | 7.78  | 2.47 | 64.18 | 2 | 2 | 2 | 1 |
| 70.86 | 3509.30 | 1.17 | 1.23  | 2.59 | 32.92 | 2 | 3 | 2 | 1 |
| 49.80 | 3595.30 | 1.24 | 2.68  | 1.73 | 31.21 | 3 | 4 | 1 | 2 |
| 36.89 | 3092.85 | 2.06 | 6.33  | 2.18 | 53.14 | 2 | 3 | 1 | 1 |
| 36.93 | 2564.01 | 1.48 | 4.72  | 1.61 | 39.33 | 2 | 3 | 1 | 1 |
| 41.19 | 2125.10 | 1.12 | 2.81  | 1.19 | 25.98 | 2 | 3 | 1 | 1 |
| 30.58 | 4611.99 | 1.73 | 7.12  | 1.73 | 51.02 | 3 | 3 | 1 | 2 |
| 30.24 | 4079.18 | 2.14 | 7.89  | 1.93 | 57.53 | 2 | 2 | 2 | 1 |
| 32.99 | 3380.55 | 1.51 | 6.09  | 1.66 | 45.38 | 2 | 3 | 1 | 1 |
| 43.19 | 4144.24 | 2.16 | 6.04  | 2.77 | 57.72 | 2 | 3 | 2 | 1 |
| 35.53 | 4179.13 | 3.23 | 10.83 | 3.44 | 87.25 | 2 | 3 | 1 | 1 |
| 34.58 | 3685.38 | 2.02 | 7.27  | 2.18 | 56.79 | 2 | 3 | 1 | 1 |
| 33.85 | 3197.51 | 1.73 | 5.87  | 1.73 | 45.94 | 2 | 2 | 2 | 1 |
| 33.32 | 3533.46 | 2.12 | 7.49  | 2.13 | 57.64 | 2 | 2 | 2 | 1 |
| 43.19 | 4388.63 | 3.91 | 3.82  | 2.61 | 54.38 | 2 | 2 | 2 | 1 |
| 48.63 | 4238.95 | 1.79 | 4.50  | 2.65 | 49.01 | 3 | 3 | 1 | 2 |
| 45.54 | 3986.91 | 1.76 | 5.82  | 2.82 | 55.68 | 2 | 3 | 2 | 1 |
| 45.08 | 3568.57 | 1.62 | 5.79  | 2.70 | 53.99 | 2 | 3 | 2 | 1 |
| 41.68 | 2556.16 | 0.95 | 3.39  | 1.38 | 29.76 | 2 | 2 | 2 | 1 |
| 43.27 | 3953.01 | 1.74 | 4.42  | 2.09 | 43.44 | 2 | 2 | 2 | 1 |
| 24.04 | 1486.40 | 0.61 | 3.69  | 0.60 | 22.62 | 2 | 3 | 1 | 1 |
| 32.15 | 1505.12 | 0.82 | 4.27  | 1.07 | 30.04 | 2 | 3 | 2 | 1 |
| 38.87 | 2889.55 | 1.02 | 3.72  | 1.34 | 31.00 | 3 | 3 | 1 | 2 |
| 52.23 | 5256.71 | 2.39 | 4.71  | 3.45 | 59.47 | 2 | 2 | 2 | 1 |
| 45.20 | 2609.18 | 1.91 | 2.65  | 1.67 | 33.28 | 2 | 3 | 2 | 1 |
| 55.23 | 2975.16 | 1.90 | 2.86  | 2.61 | 42.56 | 2 | 3 | 2 | 1 |
| 34.87 | 3288.88 | 1.69 | 5.47  | 1.70 | 43.97 | 2 | 3 | 2 | 1 |
| 26.50 | 2820.25 | 0.85 | 4.92  | 0.93 | 31.44 | 2 | 3 | 1 | 1 |
| 41.38 | 3099.54 | 1.20 | 3.42  | 1.45 | 31.53 | 2 | 3 | 1 | 1 |
| 26.99 | 3008.41 | 1.29 | 6.13  | 1.22 | 40.65 | 2 | 3 | 1 | 1 |

|       |         |      |       |      |       |   |   |   |   |
|-------|---------|------|-------|------|-------|---|---|---|---|
| 42.15 | 2256.76 | 1.03 | 2.81  | 1.24 | 26.55 | 2 | 2 | 2 | 1 |
| 36.97 | 3476.83 | 1.33 | 4.57  | 1.54 | 37.43 | 2 | 2 | 2 | 1 |
| 49.10 | 6154.20 | 2.22 | 6.00  | 3.52 | 64.58 | 2 | 2 | 2 | 1 |
| 44.67 | 3297.24 | 1.10 | 4.23  | 1.91 | 38.52 | 2 | 3 | 1 | 1 |
| 38.34 | 4109.89 | 1.89 | 7.17  | 2.50 | 58.80 | 2 | 2 | 2 | 1 |
| 37.03 | 3103.00 | 1.14 | 7.14  | 2.16 | 52.59 | 2 | 2 | 2 | 1 |
| 46.57 | 3354.69 | 1.83 | 5.16  | 2.71 | 52.34 | 2 | 3 | 2 | 1 |
| 40.44 | 3104.33 | 1.13 | 6.37  | 2.26 | 50.39 | 2 | 2 | 2 | 1 |
| 41.15 | 3372.46 | 2.28 | 6.71  | 2.79 | 61.10 | 2 | 2 | 2 | 1 |
| 25.39 | 3368.86 | 1.70 | 7.88  | 1.45 | 51.35 | 2 | 2 | 2 | 1 |
| 48.67 | 1792.86 | 1.22 | 2.29  | 1.48 | 27.37 | 2 | 3 | 1 | 1 |
| 45.80 | 2873.91 | 2.73 | 7.28  | 3.76 | 73.88 | 2 | 2 | 2 | 1 |
| 44.09 | 4088.10 | 1.58 | 5.90  | 2.62 | 53.51 | 2 | 2 | 2 | 1 |
| 39.94 | 1688.42 | 0.90 | 3.11  | 1.19 | 26.76 | 2 | 3 | 1 | 1 |
| 41.70 | 1828.74 | 1.29 | 3.79  | 1.61 | 34.83 | 2 | 2 | 2 | 1 |
| 45.28 | 2027.92 | 1.72 | 4.07  | 2.13 | 42.34 | 2 | 2 | 2 | 1 |
| 55.74 | 4338.22 | 1.38 | 3.23  | 2.58 | 41.59 | 2 | 3 | 1 | 1 |
| 48.90 | 1321.26 | 1.13 | 2.54  | 1.56 | 28.72 | 2 | 2 | 2 | 1 |
| 15.45 | 1399.97 | 1.54 | 3.39  | 0.40 | 23.33 | 2 | 2 | 1 | 1 |
| 37.23 | 3530.47 | 1.42 | 5.74  | 1.89 | 45.61 | 2 | 3 | 2 | 1 |
| 58.16 | 3142.04 | 1.40 | 2.22  | 2.24 | 34.68 | 2 | 3 | 1 | 1 |
| 36.08 | 3409.05 | 0.69 | 4.72  | 1.36 | 33.85 | 3 | 3 | 1 | 2 |
| 36.63 | 3311.21 | 2.32 | 7.44  | 2.50 | 61.55 | 2 | 2 | 3 | 1 |
| 35.53 | 3678.78 | 2.35 | 8.49  | 2.65 | 67.25 | 2 | 2 | 2 | 1 |
| 41.75 | 1923.48 | 1.40 | 3.76  | 1.64 | 35.42 | 2 | 3 | 2 | 1 |
| 45.17 | 3554.72 | 1.91 | 3.50  | 1.98 | 39.45 | 2 | 2 | 2 | 1 |
| 37.82 | 3796.21 | 1.79 | 6.57  | 2.26 | 53.77 | 2 | 3 | 2 | 1 |
| 38.18 | 2933.37 | 1.38 | 5.03  | 1.76 | 41.49 | 2 | 2 | 2 | 1 |
| 32.86 | 4505.01 | 2.75 | 11.82 | 3.17 | 86.80 | 2 | 2 | 2 | 1 |
| 38.79 | 3147.48 | 1.38 | 6.55  | 2.23 | 51.77 | 2 | 2 | 1 | 1 |
| 45.78 | 2285.50 | 0.99 | 4.79  | 2.17 | 42.64 | 2 | 2 | 2 | 1 |
| 43.49 | 4749.48 | 2.91 | 7.10  | 3.43 | 70.89 | 2 | 3 | 2 | 1 |
| 48.69 | 4793.21 | 2.13 | 6.32  | 3.56 | 65.84 | 2 | 3 | 2 | 1 |
| 42.43 | 4001.72 | 1.55 | 5.21  | 2.22 | 47.02 | 2 | 2 | 2 | 1 |
| 34.59 | 3743.68 | 2.53 | 4.92  | 1.75 | 45.60 | 2 | 2 | 2 | 1 |
| 41.37 | 2933.27 | 1.62 | 3.15  | 1.49 | 32.52 | 2 | 2 | 2 | 1 |
| 39.10 | 1419.13 | 0.94 | 2.29  | 0.92 | 21.18 | 2 | 2 | 1 | 1 |
| 28.31 | 2405.12 | 1.47 | 5.99  | 1.31 | 41.61 | 2 | 2 | 2 | 1 |
| 19.94 | 1802.10 | 1.00 | 4.82  | 0.64 | 29.07 | 2 | 2 | 1 | 1 |
| 31.31 | 1689.32 | 0.67 | 3.25  | 0.79 | 22.83 | 2 | 2 | 1 | 1 |
| 30.89 | 1363.02 | 0.97 | 2.13  | 0.61 | 17.89 | 2 | 3 | 1 | 1 |
| 35.51 | 2657.49 | 1.50 | 5.43  | 1.70 | 43.00 | 2 | 2 | 2 | 1 |
| 39.98 | 2664.16 | 0.89 | 3.53  | 1.31 | 29.41 | 2 | 3 | 1 | 1 |
| 34.48 | 4504.19 | 2.07 | 10.46 | 2.93 | 76.47 | 2 | 3 | 2 | 1 |
| 40.32 | 2233.03 | 1.22 | 2.88  | 1.23 | 27.43 | 2 | 3 | 1 | 1 |
| 43.38 | 3452.98 | 2.15 | 6.36  | 2.90 | 60.16 | 2 | 2 | 2 | 1 |
| 52.13 | 3444.23 | 2.29 | 6.23  | 4.12 | 71.16 | 2 | 3 | 2 | 1 |

|       |         |      |       |      |       |   |   |   |   |
|-------|---------|------|-------|------|-------|---|---|---|---|
| 41.72 | 4535.25 | 2.17 | 6.63  | 2.80 | 60.39 | 2 | 3 | 2 | 1 |
| 40.85 | 2601.07 | 1.31 | 5.77  | 2.17 | 47.90 | 2 | 3 | 1 | 1 |
| 47.59 | 3236.10 | 3.31 | 8.00  | 4.56 | 86.30 | 2 | 3 | 2 | 1 |
| 39.42 | 2667.00 | 1.35 | 6.03  | 2.14 | 48.76 | 2 | 2 | 1 | 1 |
| 55.05 | 2766.83 | 1.45 | 3.96  | 2.94 | 48.12 | 2 | 2 | 2 | 1 |
| 52.96 | 1918.37 | 1.39 | 2.98  | 2.19 | 37.18 | 2 | 2 | 2 | 1 |
| 34.88 | 1948.05 | 1.25 | 4.06  | 1.26 | 32.63 | 2 | 2 | 2 | 1 |
| 54.52 | 4004.51 | 1.57 | 4.12  | 3.04 | 50.12 | 2 | 3 | 1 | 1 |
| 36.44 | 2011.82 | 0.86 | 3.13  | 1.01 | 25.05 | 3 | 3 | 1 | 2 |
| 45.09 | 4840.85 | 2.49 | 5.08  | 2.76 | 55.13 | 2 | 3 | 2 | 1 |
| 41.17 | 3871.00 | 1.62 | 4.98  | 2.05 | 44.91 | 3 | 3 | 1 | 2 |
| 46.93 | 3694.75 | 1.79 | 4.43  | 2.44 | 46.89 | 2 | 3 | 1 | 1 |
| 41.34 | 3996.92 | 2.11 | 6.24  | 2.62 | 56.94 | 2 | 3 | 1 | 1 |
| 31.55 | 2730.40 | 0.95 | 4.48  | 1.11 | 31.75 | 2 | 3 | 1 | 1 |
| 37.82 | 2409.43 | 1.49 | 4.35  | 1.58 | 37.59 | 2 | 3 | 2 | 1 |
| 37.17 | 2534.92 | 1.17 | 6.18  | 1.93 | 46.77 | 2 | 2 | 2 | 1 |
| 50.22 | 2316.78 | 2.09 | 4.73  | 3.06 | 54.77 | 2 | 3 | 2 | 1 |
| 54.00 | 3242.44 | 0.92 | 2.75  | 1.91 | 31.91 | 3 | 3 | 1 | 2 |
| 49.21 | 2546.52 | 1.71 | 4.21  | 2.55 | 46.64 | 2 | 3 | 1 | 1 |
| 42.94 | 2569.13 | 1.16 | 3.57  | 1.58 | 33.15 | 2 | 3 | 2 | 1 |
| 36.33 | 3497.48 | 1.81 | 4.86  | 1.69 | 41.89 | 3 | 3 | 1 | 2 |
| 45.57 | 5055.06 | 2.10 | 6.31  | 3.13 | 61.80 | 2 | 3 | 2 | 1 |
| 35.13 | 4780.83 | 2.84 | 8.06  | 2.62 | 67.24 | 2 | 2 | 2 | 1 |
| 37.56 | 2911.13 | 1.42 | 5.11  | 1.75 | 41.83 | 2 | 3 | 2 | 1 |
| 39.19 | 4545.17 | 1.98 | 6.61  | 2.46 | 56.46 | 2 | 2 | 2 | 1 |
| 38.84 | 2590.06 | 1.52 | 4.88  | 1.81 | 41.91 | 2 | 2 | 2 | 1 |
| 40.10 | 2496.00 | 1.56 | 5.22  | 2.01 | 45.22 | 2 | 2 | 2 | 1 |
| 19.88 | 3244.00 | 2.43 | 5.50  | 0.88 | 39.56 | 2 | 3 | 1 | 1 |
| 42.24 | 2648.90 | 2.14 | 5.72  | 2.55 | 54.39 | 2 | 2 | 2 | 1 |
| 26.01 | 5307.86 | 3.11 | 12.33 | 2.41 | 83.46 | 2 | 2 | 2 | 1 |
| 39.13 | 2564.76 | 1.05 | 5.80  | 1.96 | 45.00 | 2 | 2 | 1 | 1 |
| 50.16 | 3871.04 | 2.20 | 3.97  | 2.76 | 49.57 | 2 | 3 | 1 | 1 |
| 39.73 | 3704.20 | 1.25 | 5.88  | 2.09 | 47.37 | 2 | 2 | 2 | 1 |
| 44.69 | 3157.33 | 0.84 | 4.19  | 1.81 | 36.42 | 2 | 2 | 2 | 1 |
| 40.02 | 3708.20 | 1.19 | 4.78  | 1.77 | 39.83 | 2 | 2 | 2 | 1 |
| 18.61 | 2949.65 | 1.14 | 6.20  | 0.75 | 36.06 | 2 | 2 | 2 | 1 |
| 51.58 | 3991.23 | 1.63 | 4.21  | 2.77 | 48.26 | 2 | 3 | 2 | 1 |
| 58.56 | 3060.68 | 1.99 | 2.89  | 3.07 | 47.16 | 2 | 2 | 2 | 1 |
| 31.62 | 3523.08 | 1.60 | 5.37  | 1.43 | 40.73 | 2 | 3 | 1 | 1 |
| 50.39 | 5729.86 | 2.06 | 6.75  | 3.98 | 71.00 | 2 | 2 | 2 | 1 |
| 34.56 | 2375.13 | 1.19 | 3.74  | 1.16 | 30.18 | 3 | 3 | 1 | 2 |
| 43.28 | 3039.44 | 1.45 | 5.26  | 2.27 | 47.27 | 2 | 2 | 1 | 1 |
| 49.16 | 3584.31 | 1.59 | 4.82  | 2.75 | 50.34 | 2 | 2 | 2 | 1 |
| 37.50 | 3300.04 | 1.55 | 5.34  | 1.84 | 44.12 | 2 | 3 | 1 | 1 |
| 51.37 | 2973.89 | 1.46 | 2.80  | 2.00 | 35.11 | 2 | 2 | 2 | 1 |
| 34.31 | 3604.58 | 1.84 | 8.33  | 2.36 | 61.93 | 2 | 2 | 2 | 1 |
| 39.58 | 4056.75 | 3.00 | 7.51  | 3.06 | 69.58 | 2 | 2 | 2 | 1 |



|       |         |      |       |      |        |   |   |   |   |
|-------|---------|------|-------|------|--------|---|---|---|---|
| 44.54 | 6023.87 | 3.27 | 11.65 | 5.32 | 107.57 | 2 | 2 | 2 | 1 |
| 44.86 | 3989.44 | 2.10 | 5.49  | 2.74 | 55.03  | 2 | 2 | 2 | 1 |

## MEZOMOR EKTOMORFAS\_2x\_GROUP

[illegible]

[illegible]

|   |   |
|---|---|
| 1 | 1 |
| 1 | 1 |
| 1 | 1 |
| 2 | 1 |
| 1 | 1 |
| 1 | 1 |
| 2 | 1 |
| 1 | 1 |
| 1 | 1 |
| 1 | 1 |
| 2 | 1 |
| 1 | 1 |
| 1 | 1 |
| 2 | 1 |
| 1 | 1 |
| 1 | 1 |
| 2 | 1 |
| 1 | 1 |
| 1 | 1 |
| 2 | 1 |
| 2 | 1 |
| 2 | 1 |
| 1 | 2 |
| 1 | 1 |
| 2 | 1 |
| 1 | 1 |
| 2 | 1 |
| 1 | 1 |
| 1 | 1 |
| 1 | 1 |
| 1 | 1 |
| 1 | 1 |
| 1 | 1 |
| 2 | 1 |
| 2 | 1 |
| 1 | 1 |
| 1 | 1 |
| 1 | 1 |
| 1 | 1 |
| 1 | 1 |
| 1 | 1 |
| 1 | 1 |
| 1 | 1 |
| 2 | 1 |
| 1 | 1 |
| 2 | 1 |
| 2 | 1 |
| 2 | 1 |
| 1 | 1 |
| 2 | 1 |

|   |   |
|---|---|
| 2 | 1 |
| 2 | 1 |
| 2 | 1 |
| 1 | 1 |
| 1 | 1 |
| 1 | 1 |
| 1 | 1 |
| 2 | 1 |
| 2 | 1 |
| 2 | 1 |
| 2 | 1 |
| 2 | 1 |
| 2 | 1 |
| 2 | 1 |
| 1 | 1 |
| 2 | 1 |
| 2 | 1 |
| 2 | 1 |
| 2 | 1 |
| 2 | 1 |
| 1 | 1 |
| 2 | 1 |
| 1 | 1 |
| 1 | 1 |
| 1 | 1 |
| 2 | 1 |
| 1 | 1 |
| 1 | 1 |
| 1 | 1 |
| 2 | 1 |
| 1 | 1 |
| 1 | 1 |
| 1 | 1 |
| 2 | 1 |
| 1 | 1 |
| 2 | 1 |
| 1 | 1 |
| 2 | 1 |
| 1 | 1 |
| 1 | 1 |
| 2 | 1 |
| 1 | 1 |
| 1 | 1 |
| 1 | 1 |

|   |   |
|---|---|
| 1 | 1 |
| 1 | 1 |
